# Supplementary material for: A gram-scale synthesis of very-long chain polyunsaturated fatty acids (VLC-PUFAs)
Source: Royal Society of Chemistry journal article supplement (doi:10.1039/d4ob00536h), 2024-01-01

**A Gram-Scale Synthesis of Very Long Chain Polyunsaturated Fatty Acids (VLC-PUFAs).**

Changqing Song, Alex Wade, Jon D. Rainier

Department of Chemistry

315 South, 1100 East

University of Utah 84112

**Supporting Information-Spectral Data Table of Contents**

| <b>Compound</b> | <b>Spectra</b>                     | <b>Page</b> |
|-----------------|------------------------------------|-------------|
| <b>12</b>       | $^1\text{H}$                       | 2           |
| <b>12</b>       | $^{13}\text{C}$                    | 3           |
| <b>13</b>       | $^1\text{H}$                       | 4           |
| <b>13</b>       | $^{13}\text{C}$                    | 5           |
| <b>S1</b>       | $^1\text{H}$                       | 6           |
| <b>S1</b>       | $^{13}\text{C}$                    | 7           |
| <b>14</b>       | $^1\text{H}$                       | 8           |
| <b>14</b>       | $^{13}\text{C}$                    | 9           |
| <b>1</b>        | $^1\text{H}$                       | 10          |
| <b>1</b>        | $^{13}\text{C}$                    | 11          |
| <b>16</b>       | $^1\text{H}$                       | 12          |
| <b>16</b>       | $^{13}\text{C}$                    | 13          |
| <b>17</b>       | $^1\text{H}$                       | 14          |
| <b>17</b>       | $^{13}\text{C}$                    | 15          |
| <b>18</b>       | $^1\text{H}$                       | 16          |
| <b>18</b>       | $^{13}\text{C}$                    | 17          |
| <b>19</b>       | $^1\text{H}$                       | 18          |
| <b>19</b>       | $^{13}\text{C}$                    | 19          |
| <b>20</b>       | $^1\text{H}$ ( $\text{CDCl}_3$ )   | 20          |
| <b>20</b>       | $^1\text{H}$ ( $\text{DMSO}-d_6$ ) | 21          |
| <b>20</b>       | $^{13}\text{C}$                    | 22          |

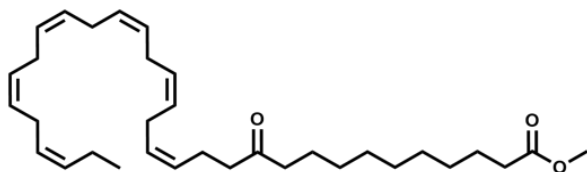

12, <sup>1</sup>H NMR (500 MHz, CDCl<sub>3</sub>)

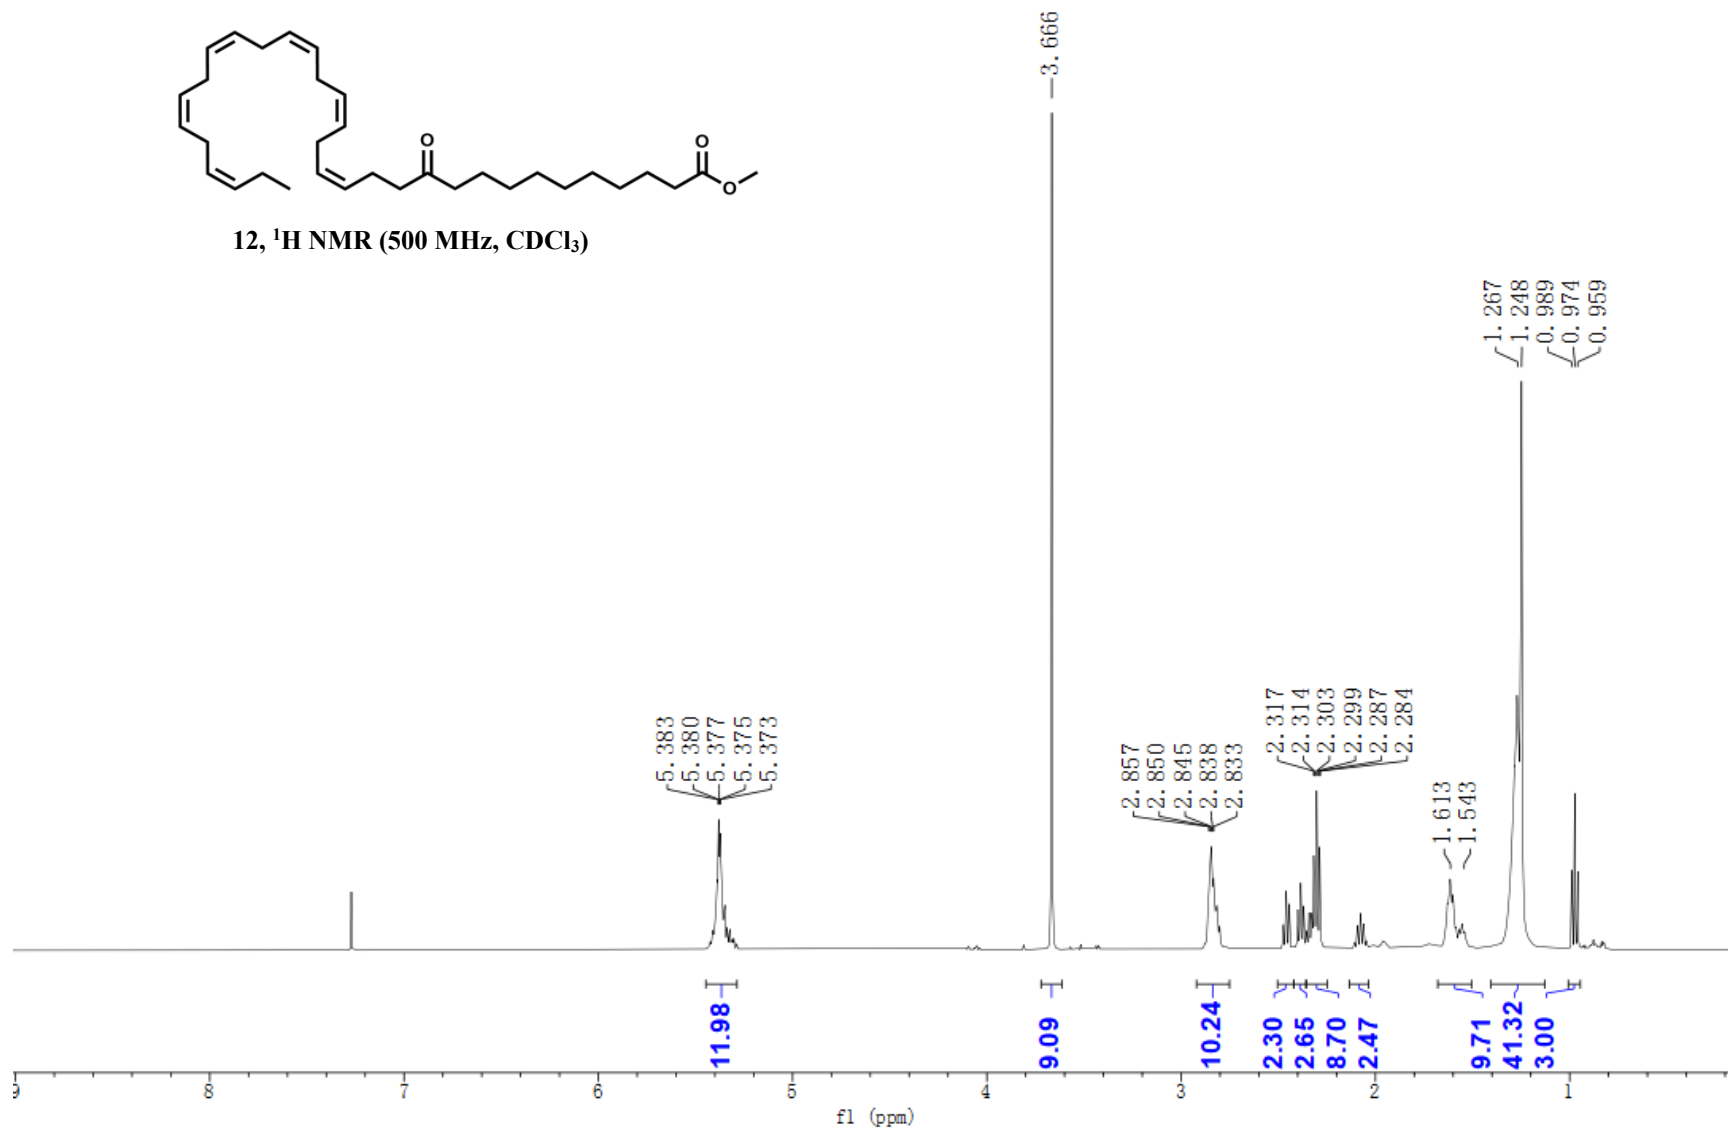

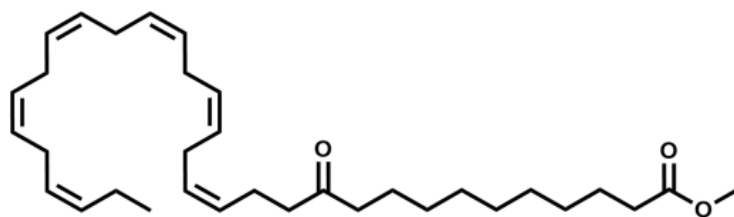

12,  $^{13}\text{C}$  NMR (126 MHz,  $\text{CDCl}_3$ )

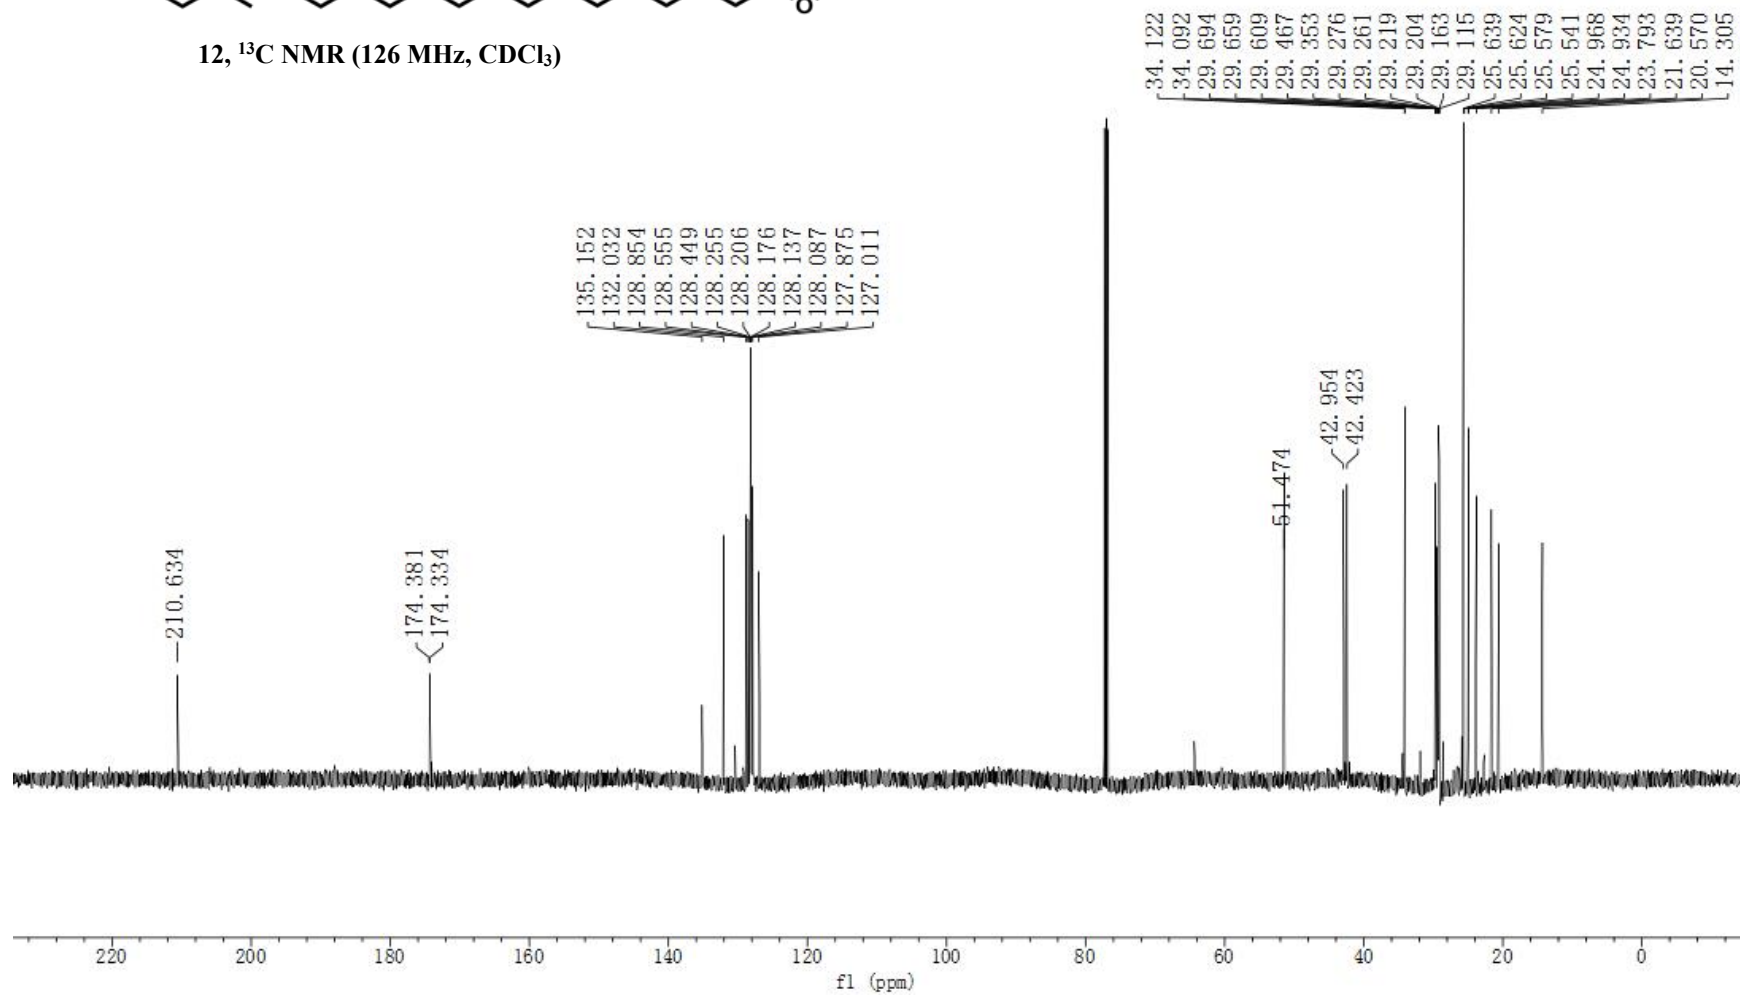

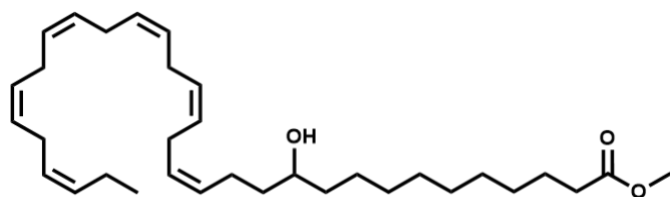

13, <sup>1</sup>H NMR (500 MHz, CDCl<sub>3</sub>)

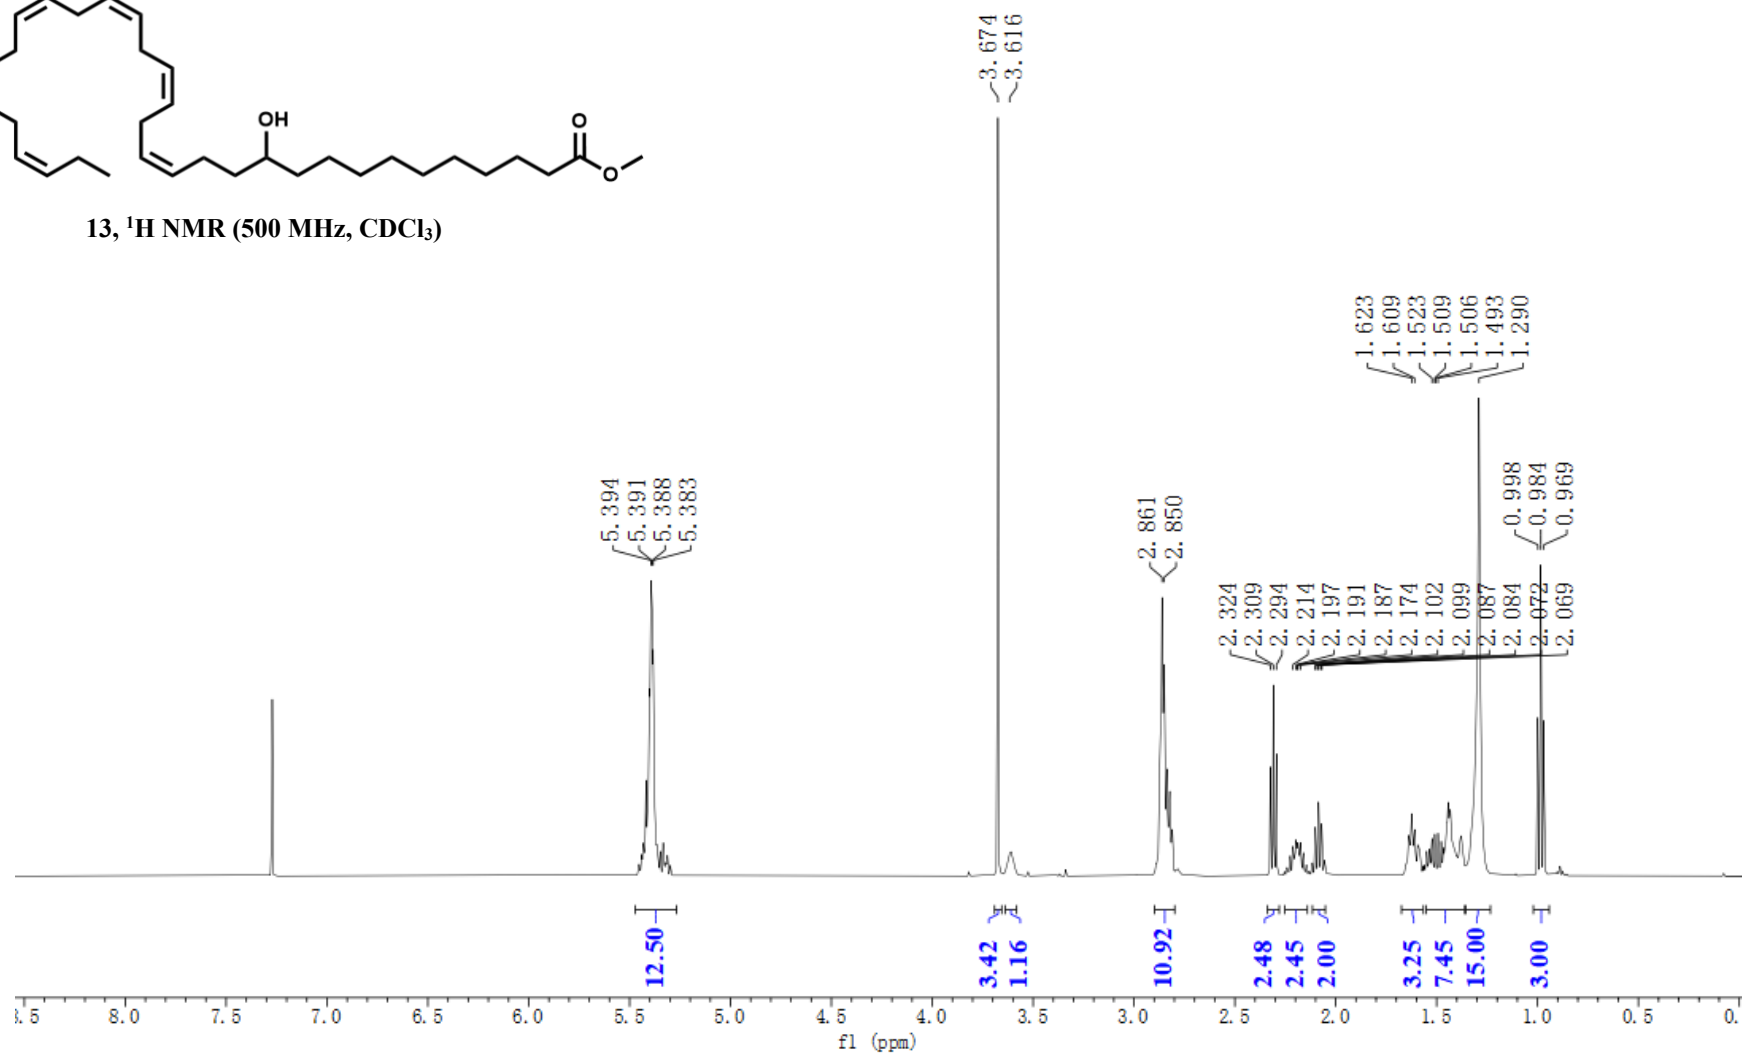

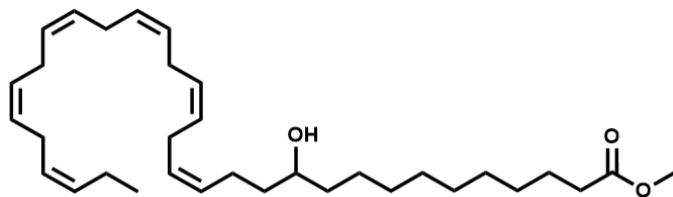

13,  $^{13}\text{C}$  NMR (126 MHz,  $\text{CDCl}_3$ )

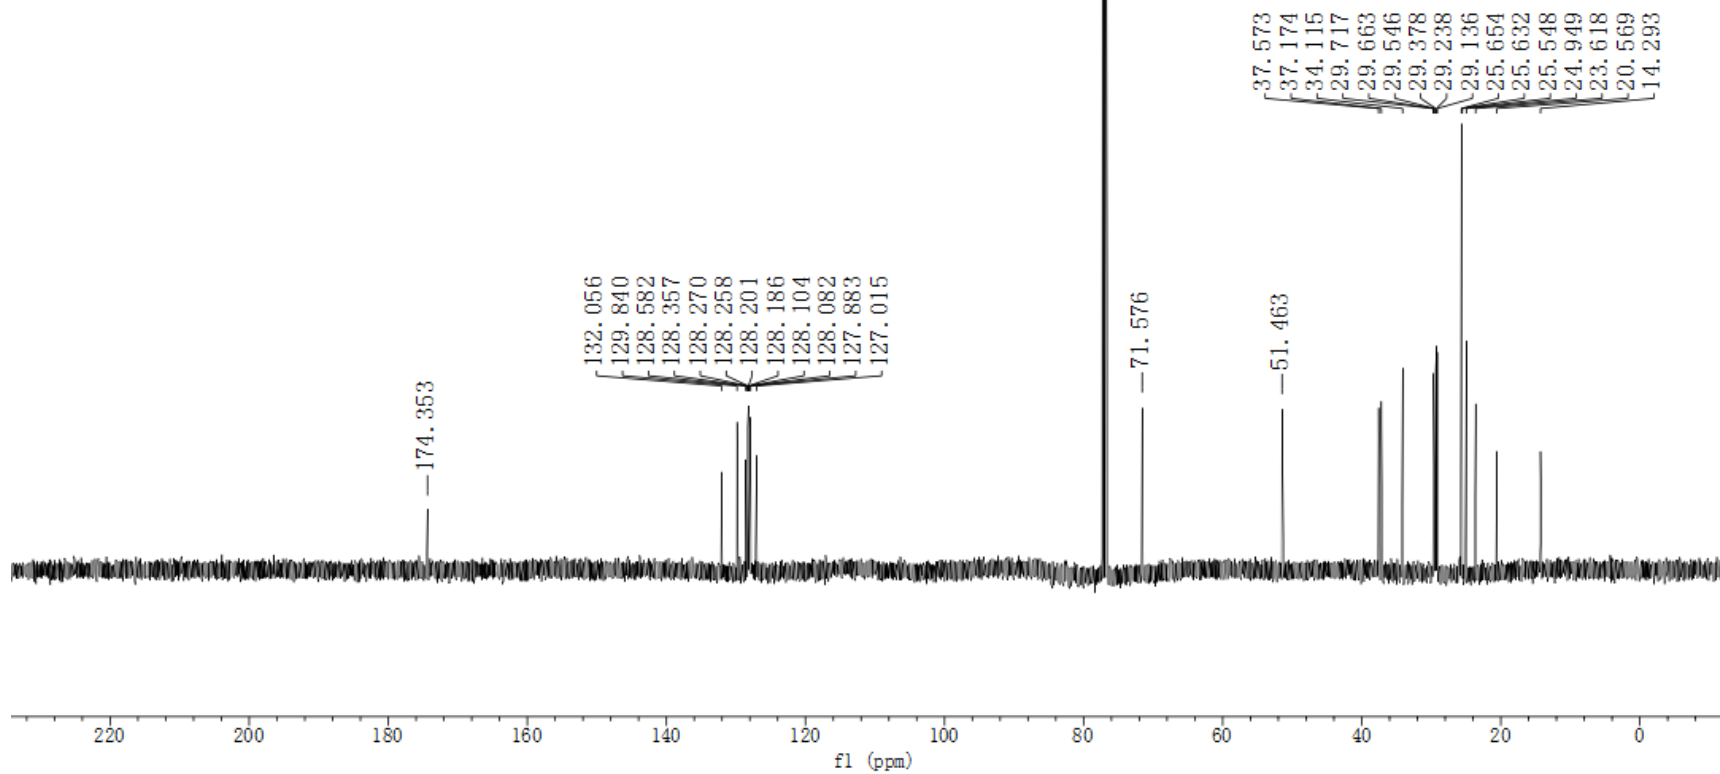

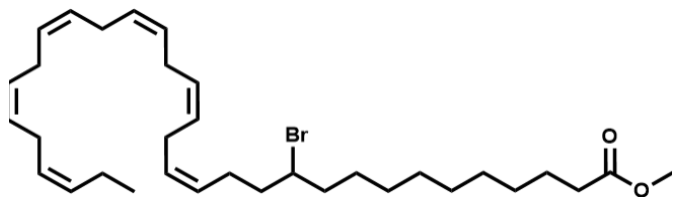

S1, <sup>1</sup>H NMR (500 MHz, CDCl<sub>3</sub>)

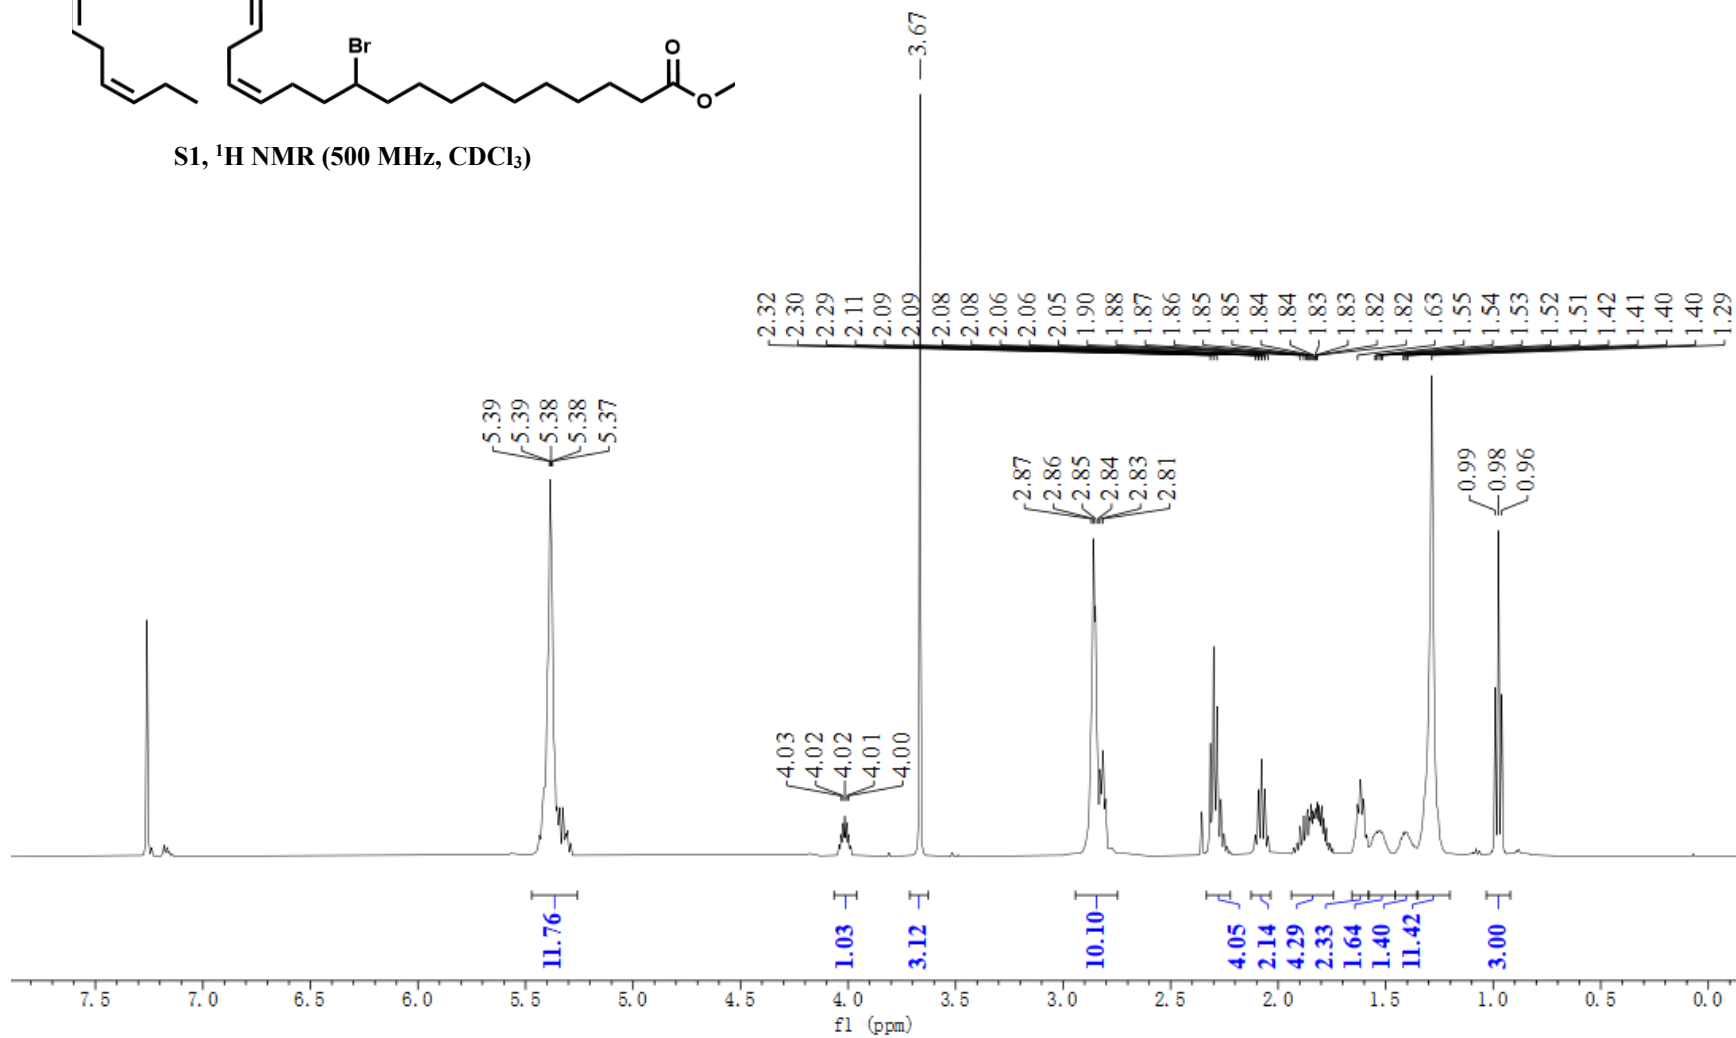

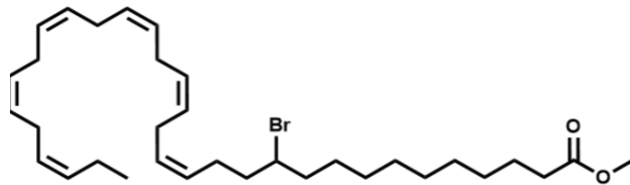

S1, <sup>13</sup>C NMR (126 MHz, CDCl<sub>3</sub>)

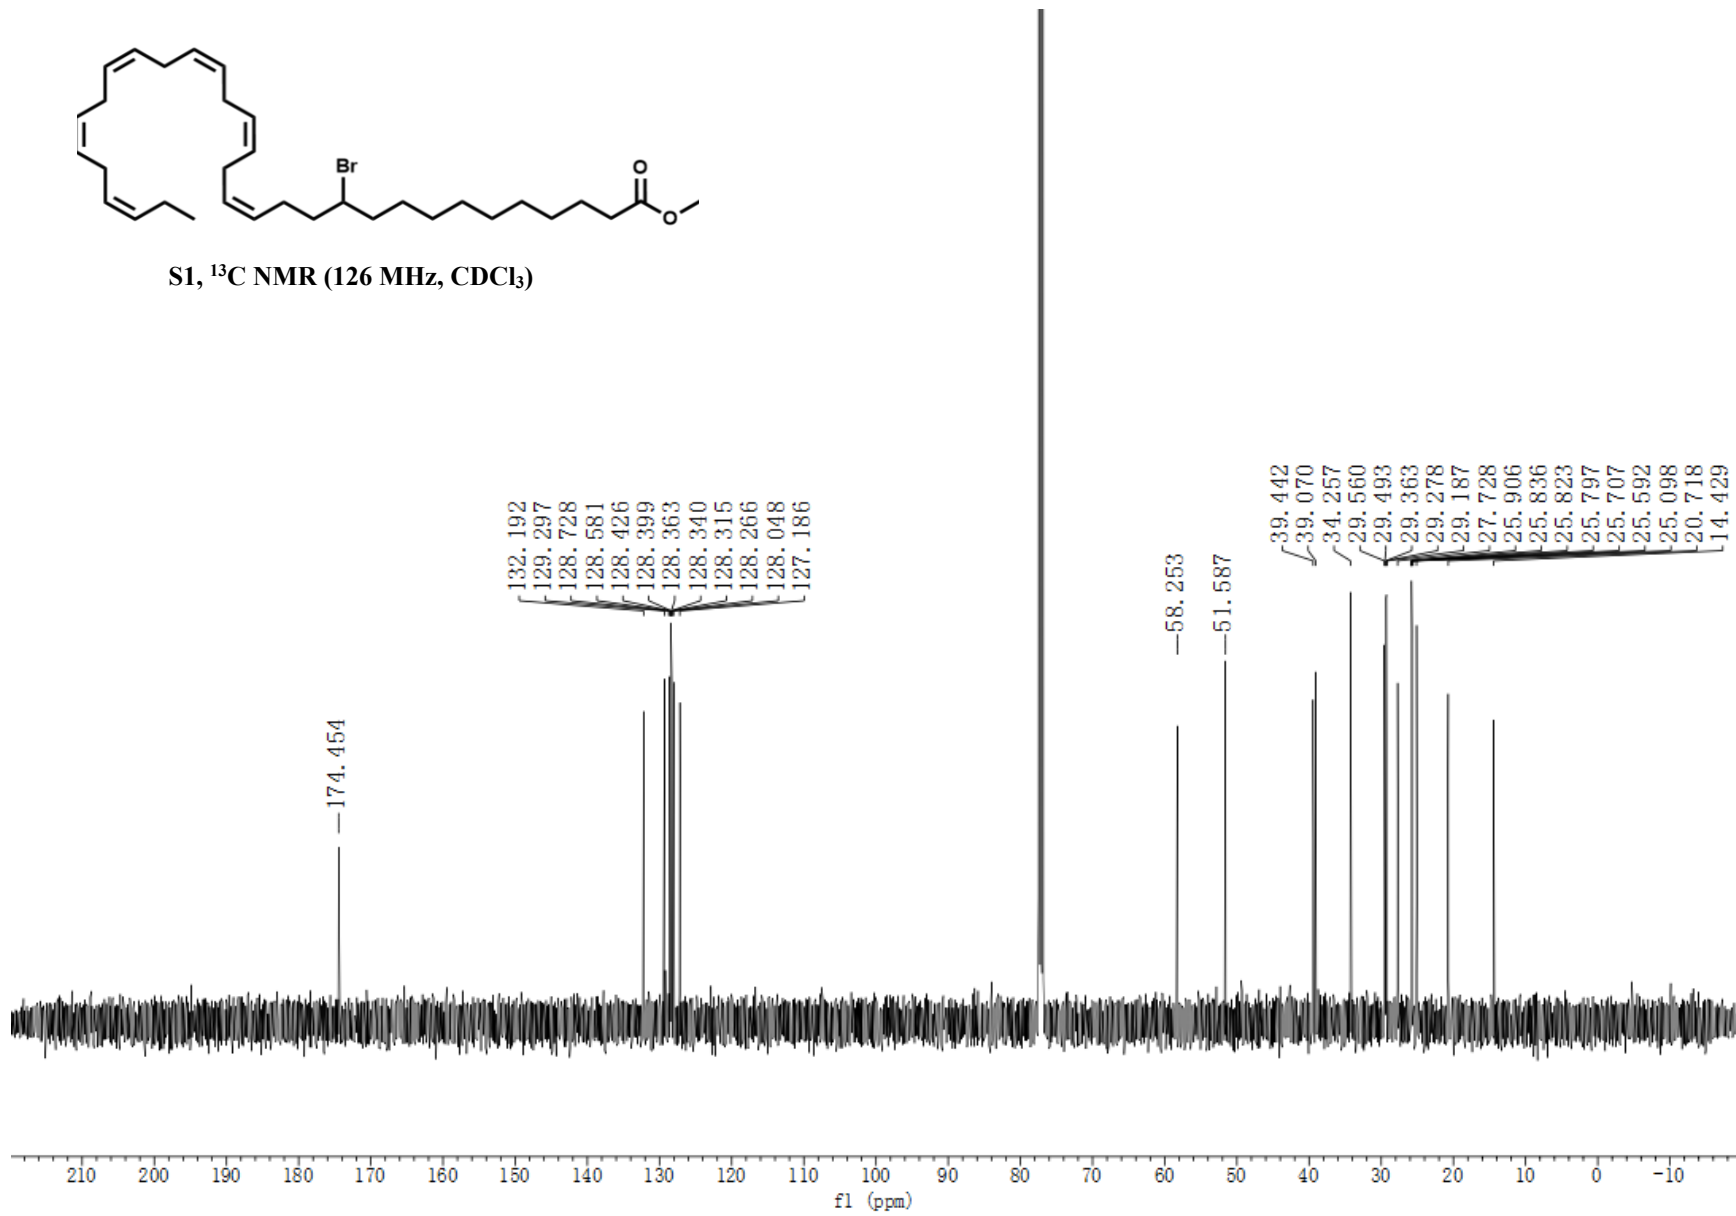

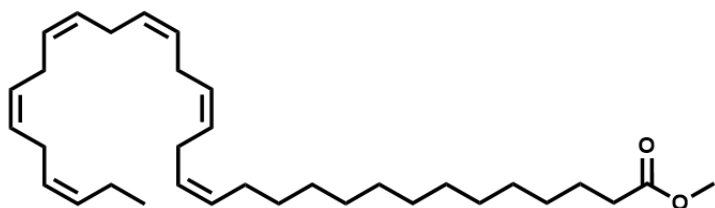

14,  $^1\text{H}$  NMR (500 MHz,  $\text{CDCl}_3$ )

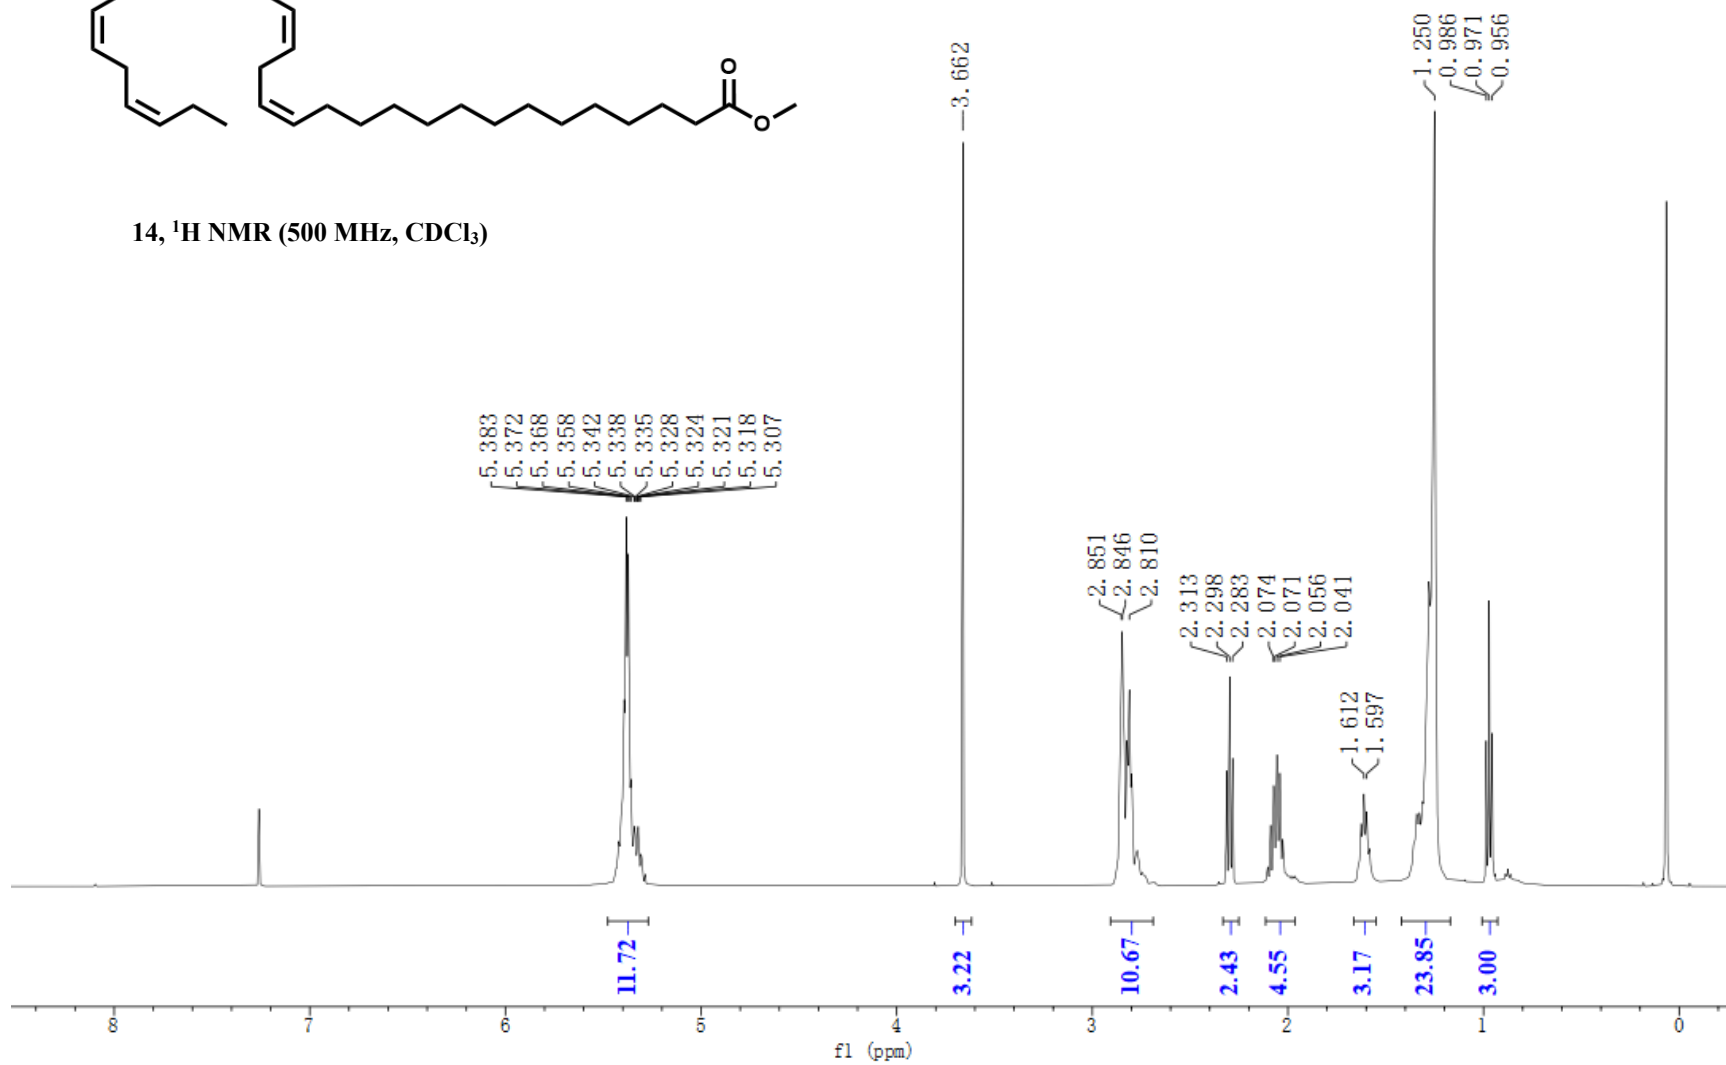



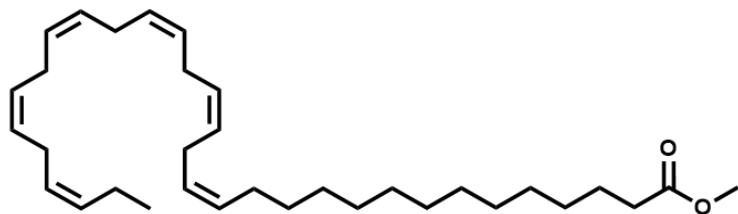

14,  $^{13}\text{C}$  NMR (126 MHz,  $\text{CDCl}_3$ )

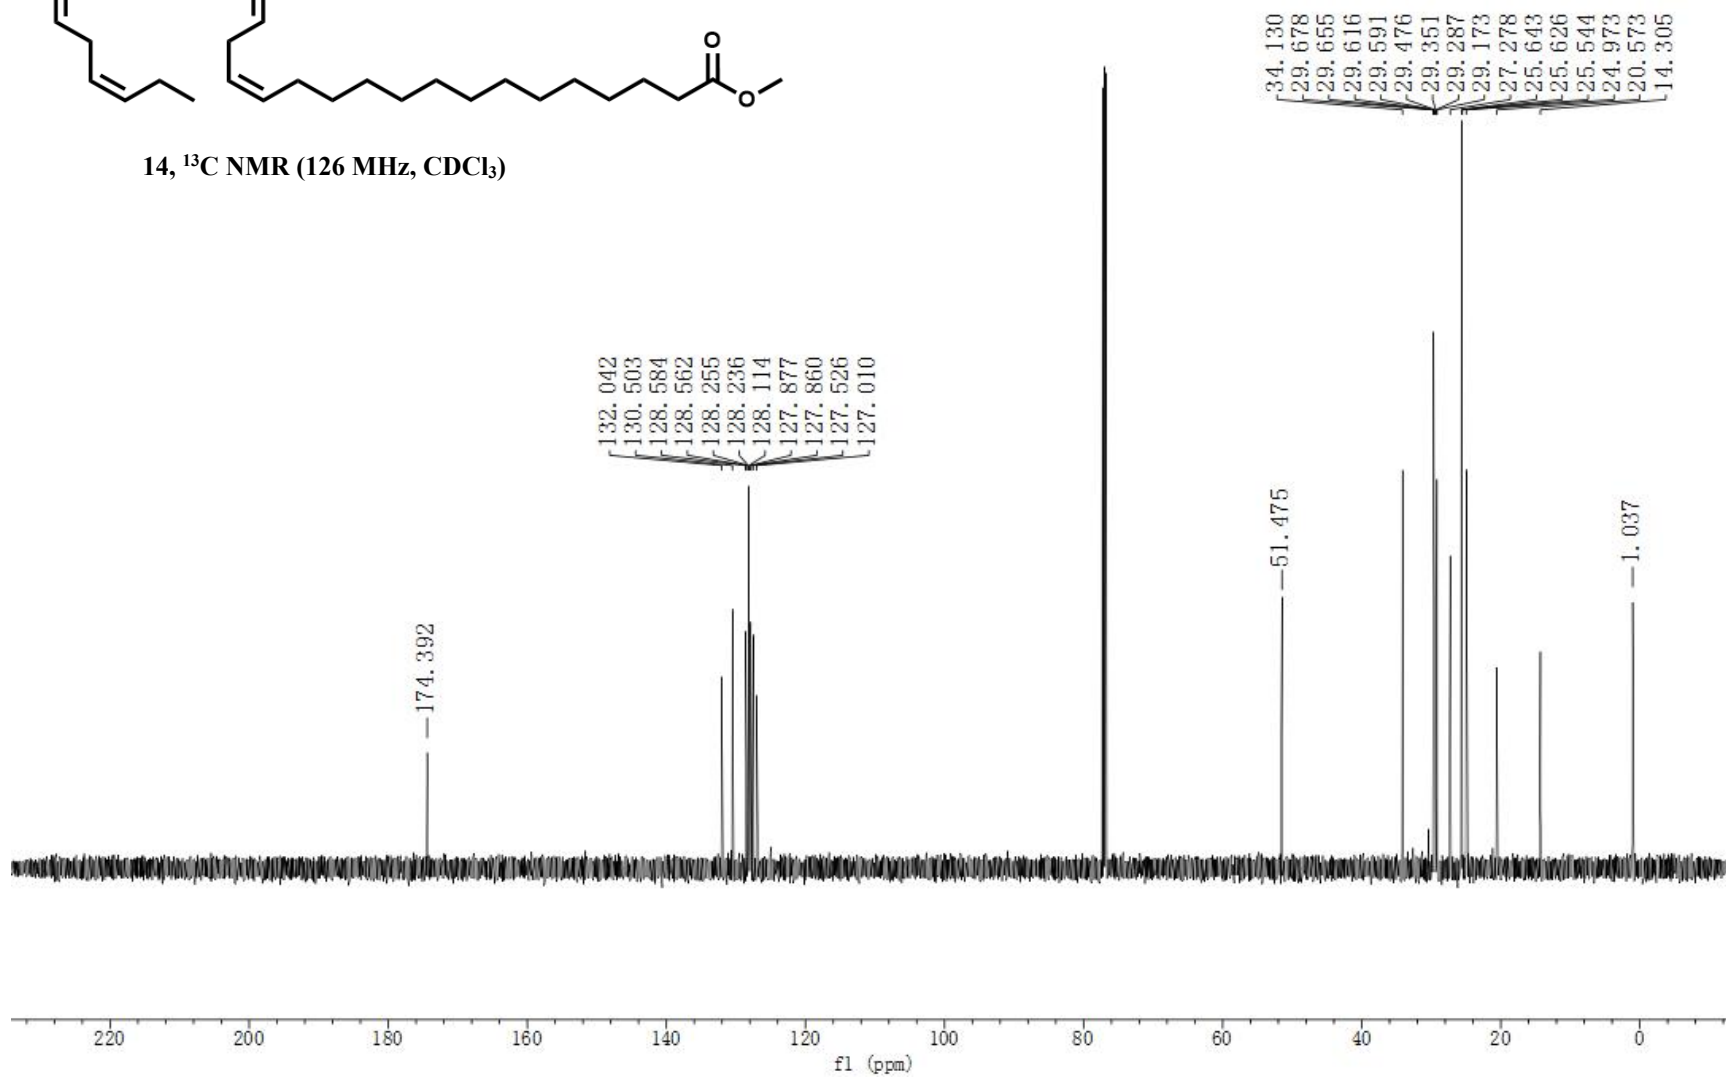

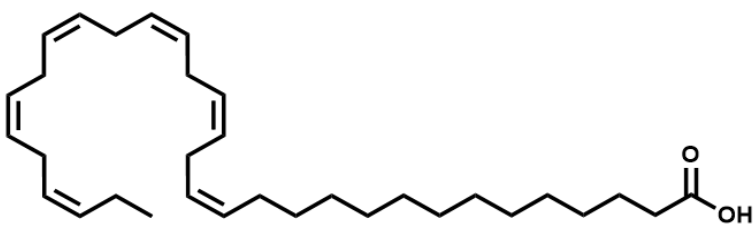

1, <sup>1</sup>H NMR (500 MHz, CDCl<sub>3</sub>)

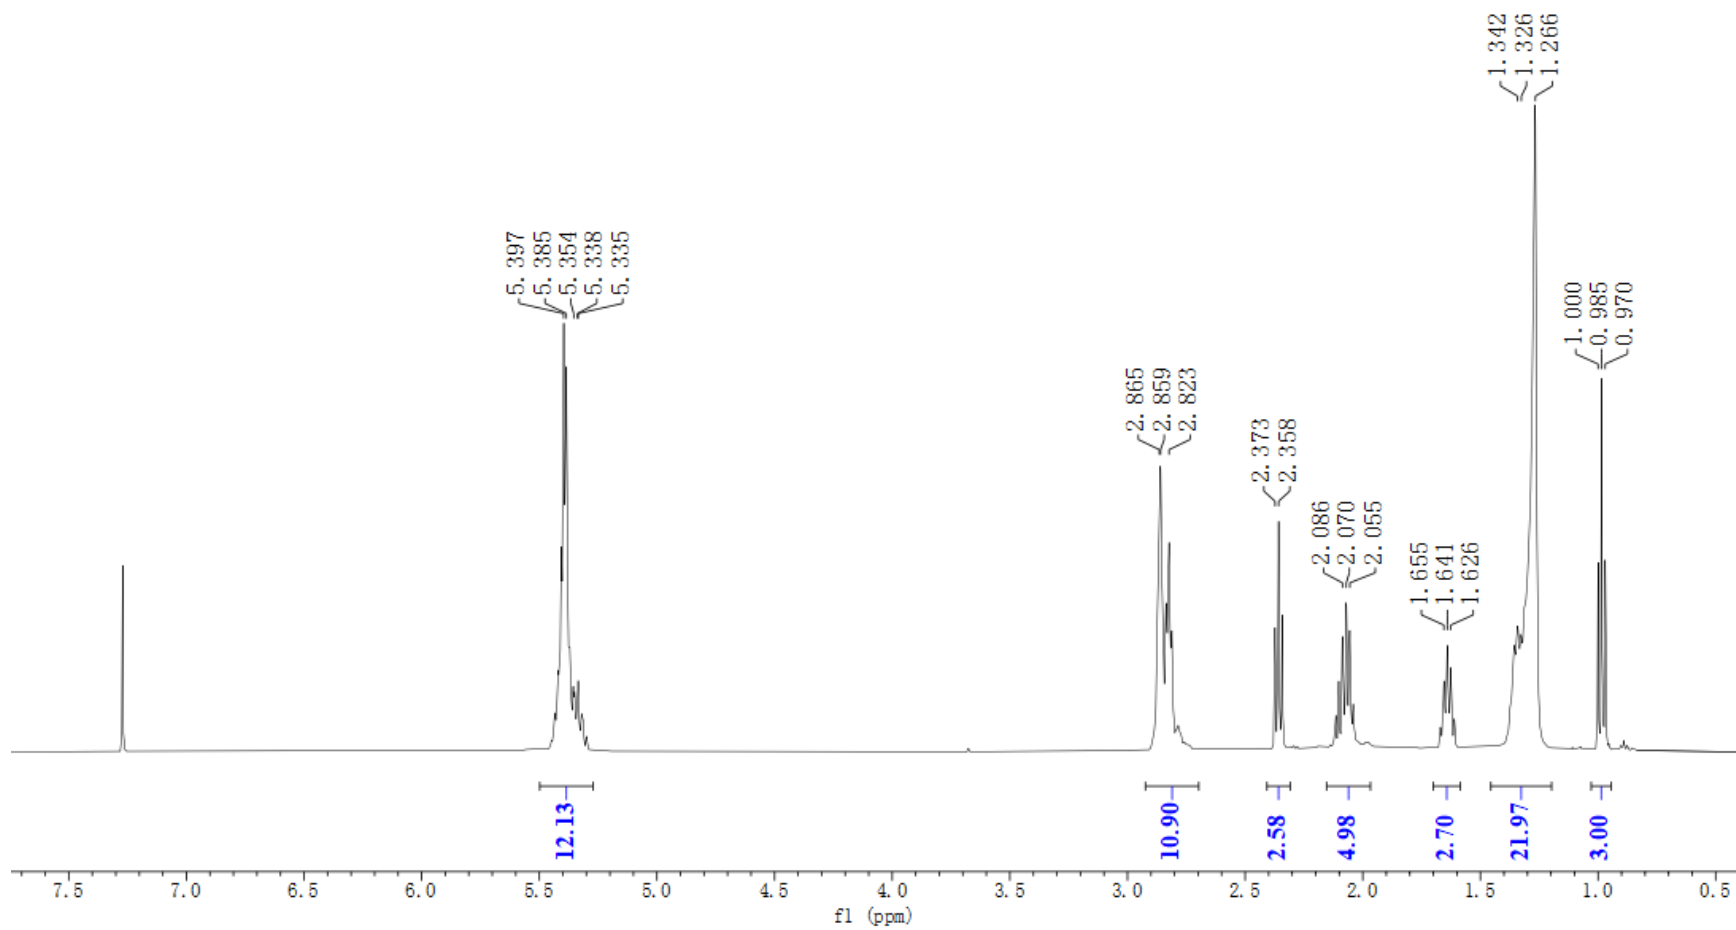

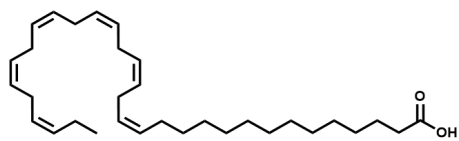

1,  $^{13}\text{C}$  NMR (126 MHz,  $\text{CDCl}_3$ )

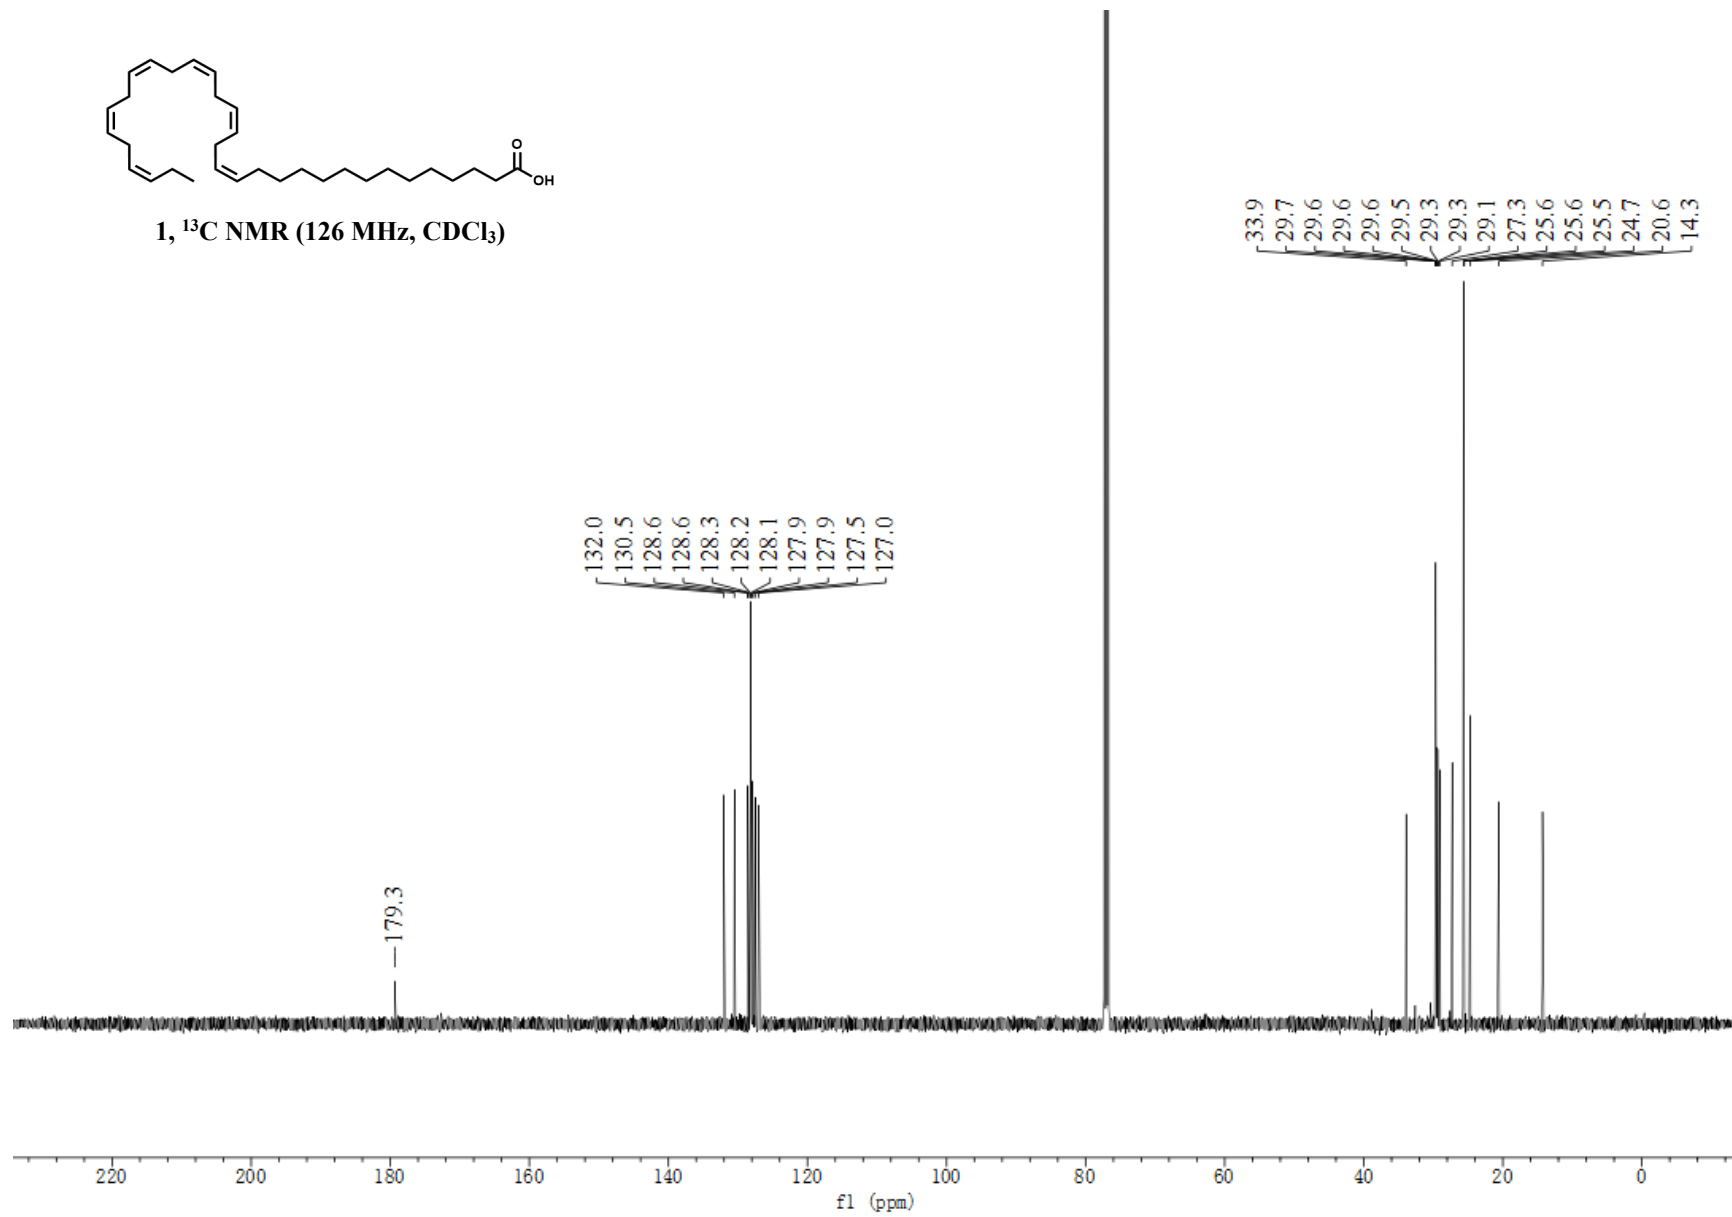

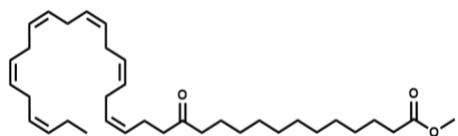

16, <sup>1</sup>H NMR (500 MHz, CDCl<sub>3</sub>)

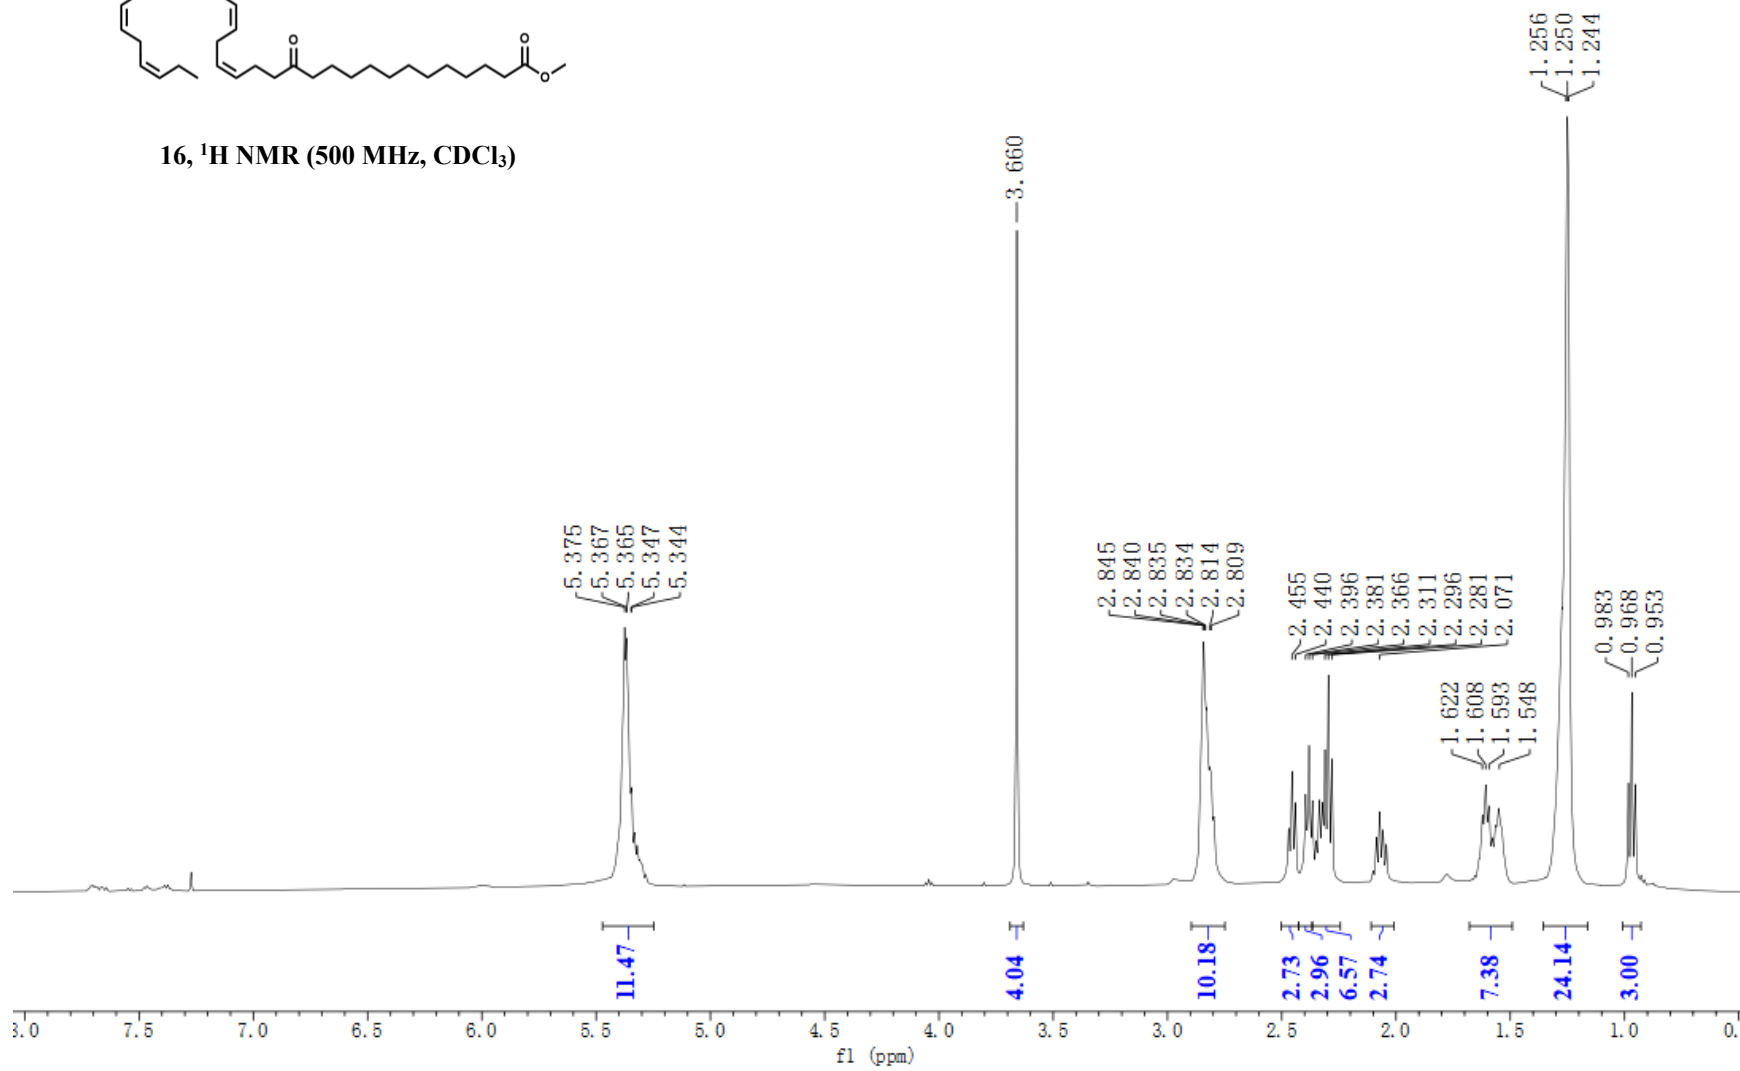

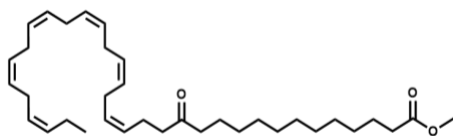

16,  $^{13}\text{C}$  NMR (126 MHz,  $\text{CDCl}_3$ )

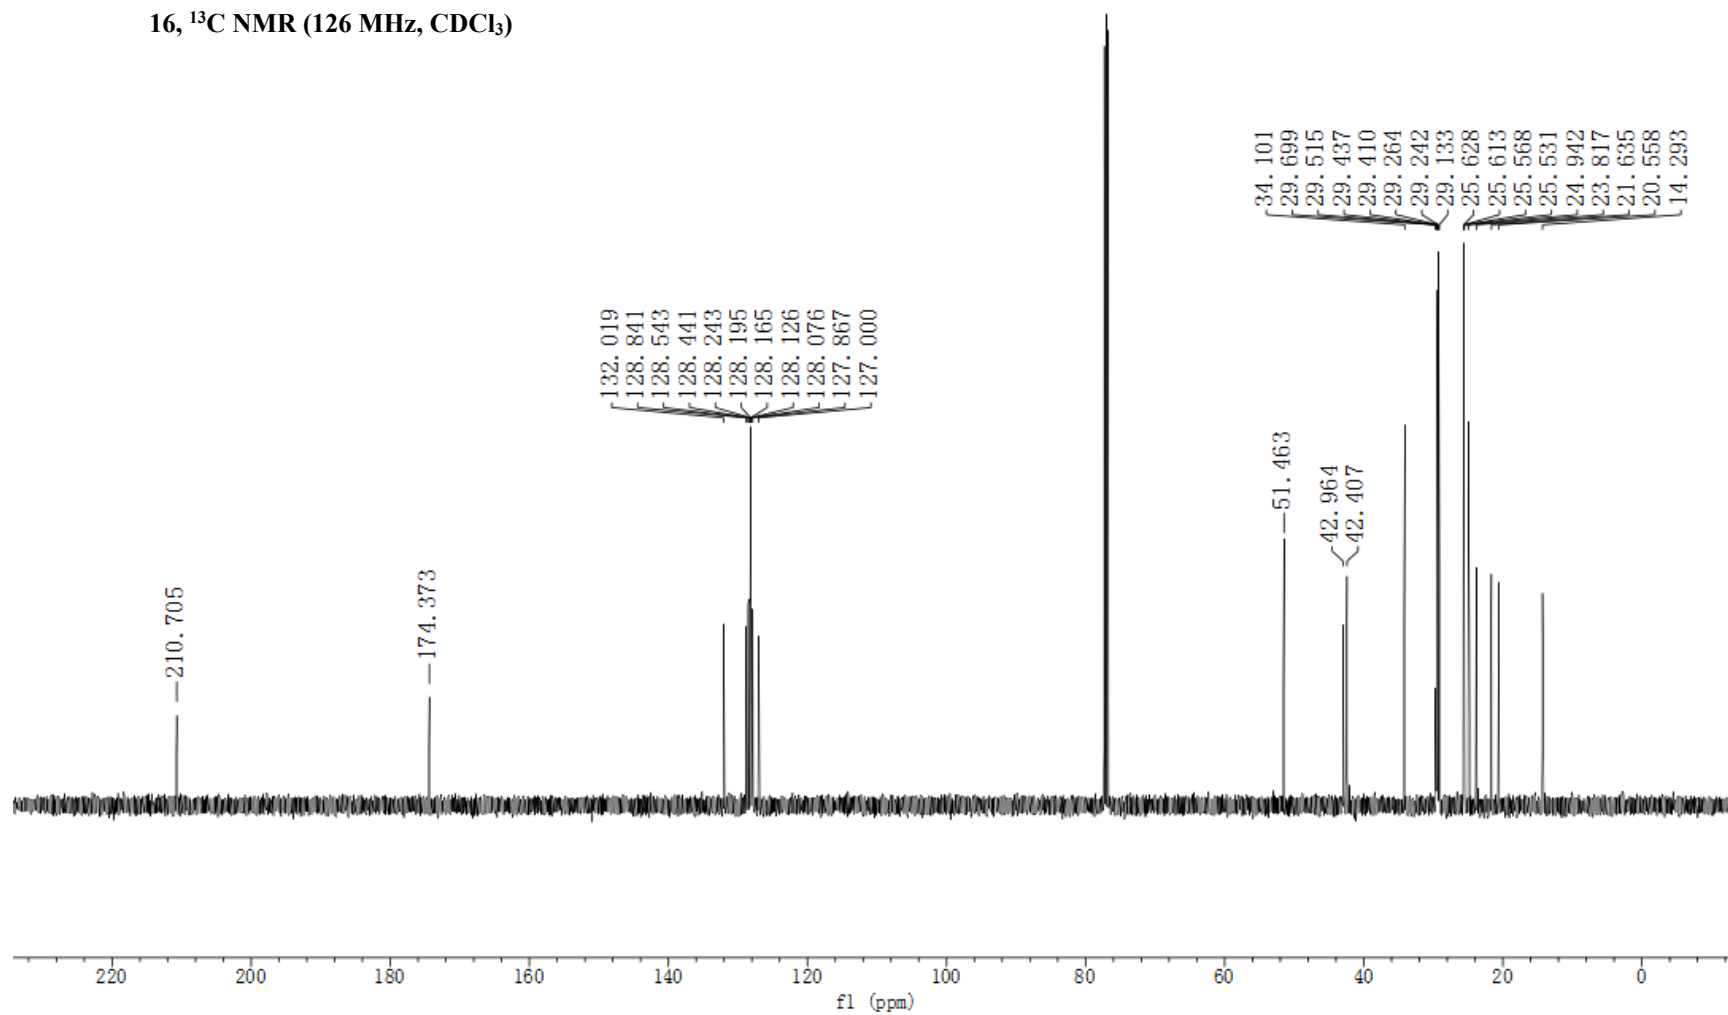

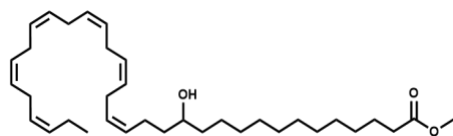

17, <sup>1</sup>H NMR (500 MHz, CDCl<sub>3</sub>)

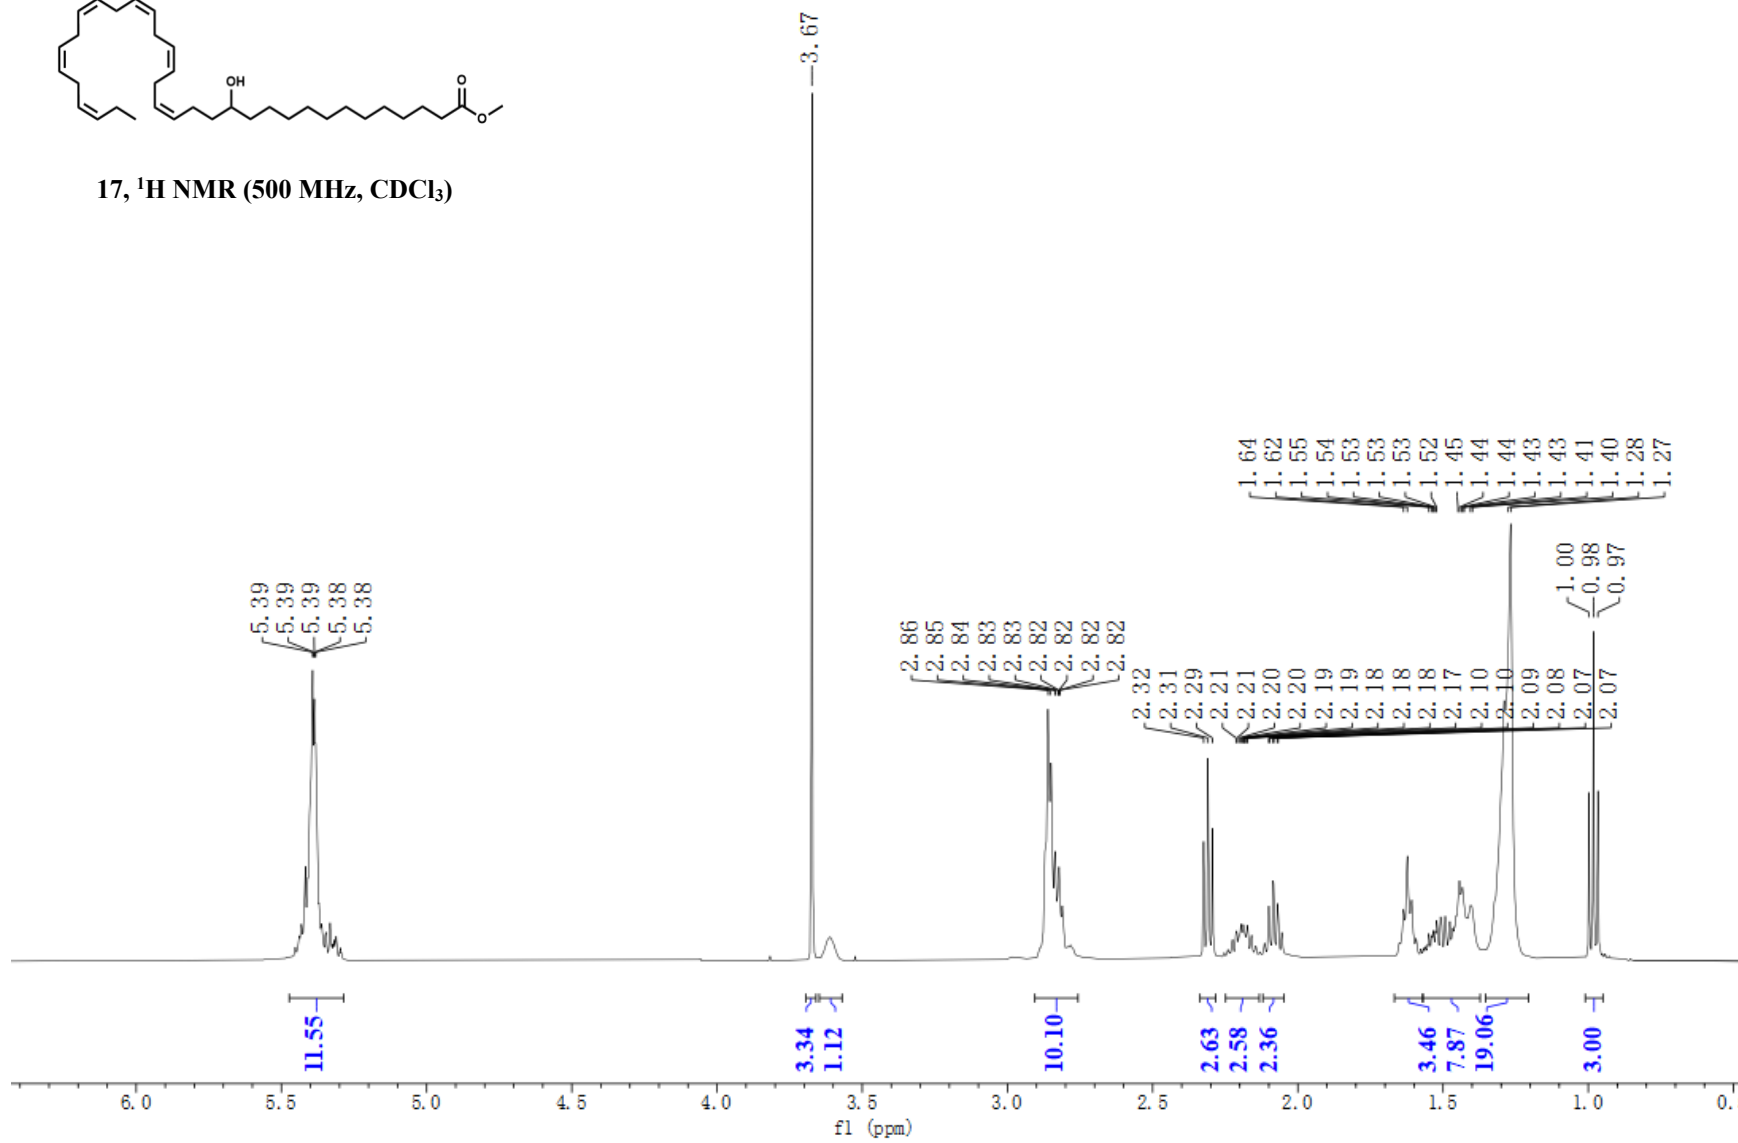

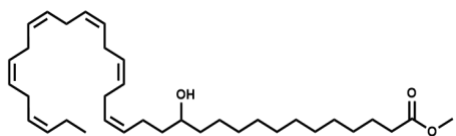

17,  $^{13}\text{C}$  NMR (126 MHz,  $\text{CDCl}_3$ )

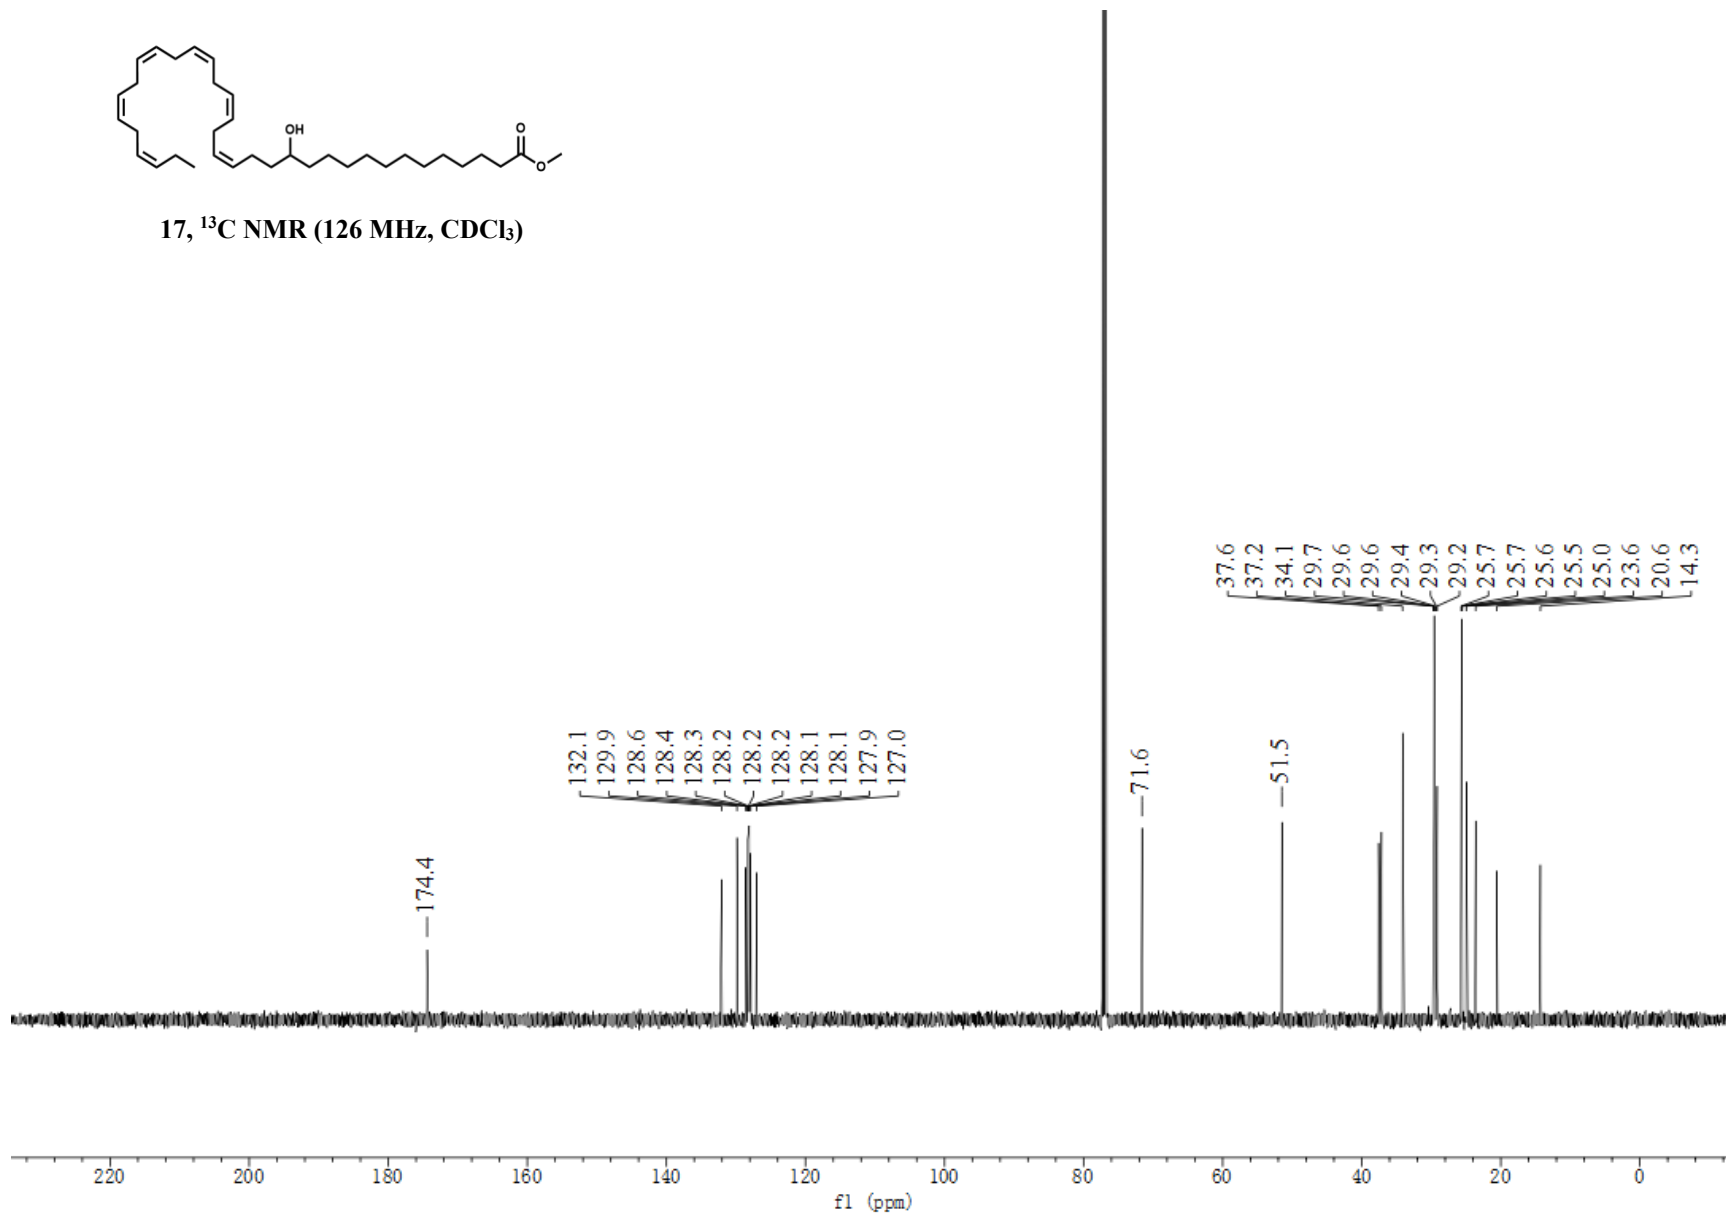

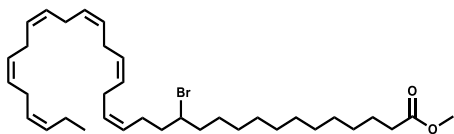

18, <sup>1</sup>H NMR (500 MHz, CDCl<sub>3</sub>)

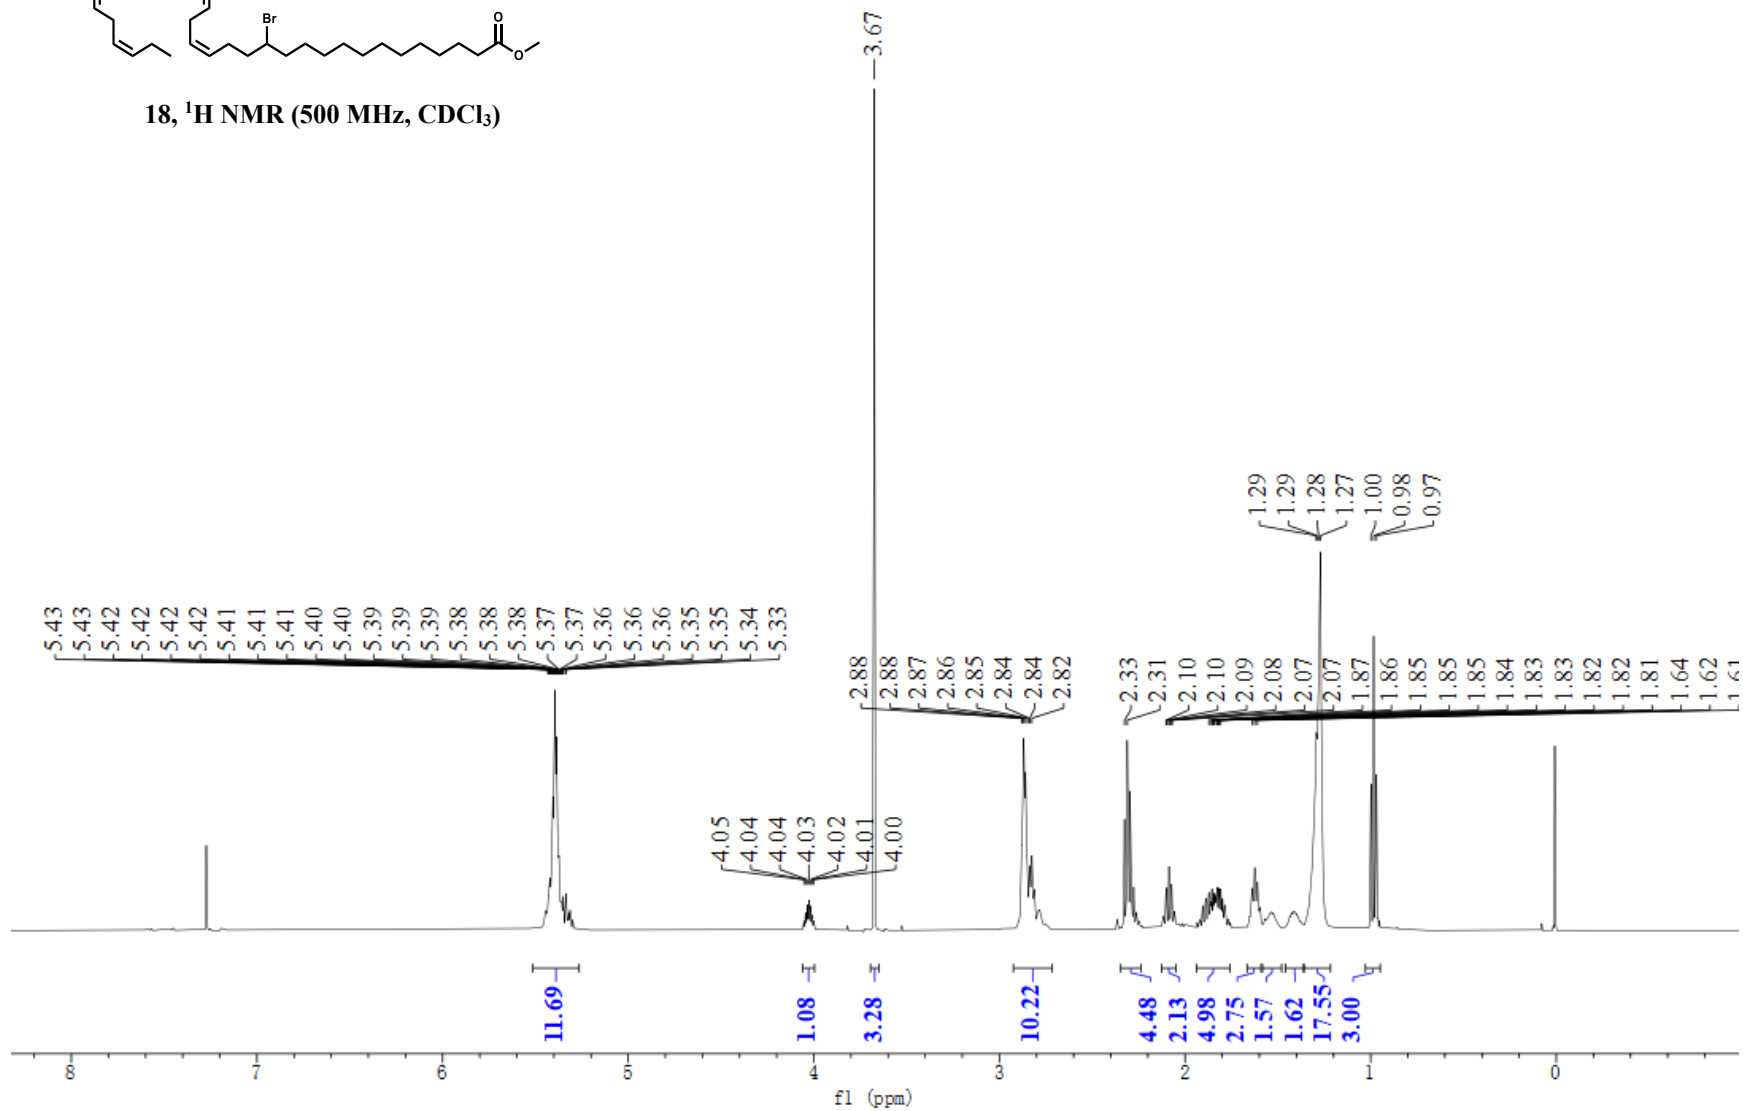



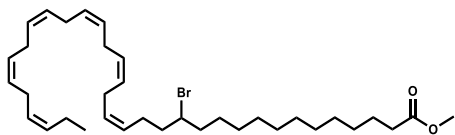

18,  $^{13}\text{C}$  NMR (126 MHz,  $\text{CDCl}_3$ )

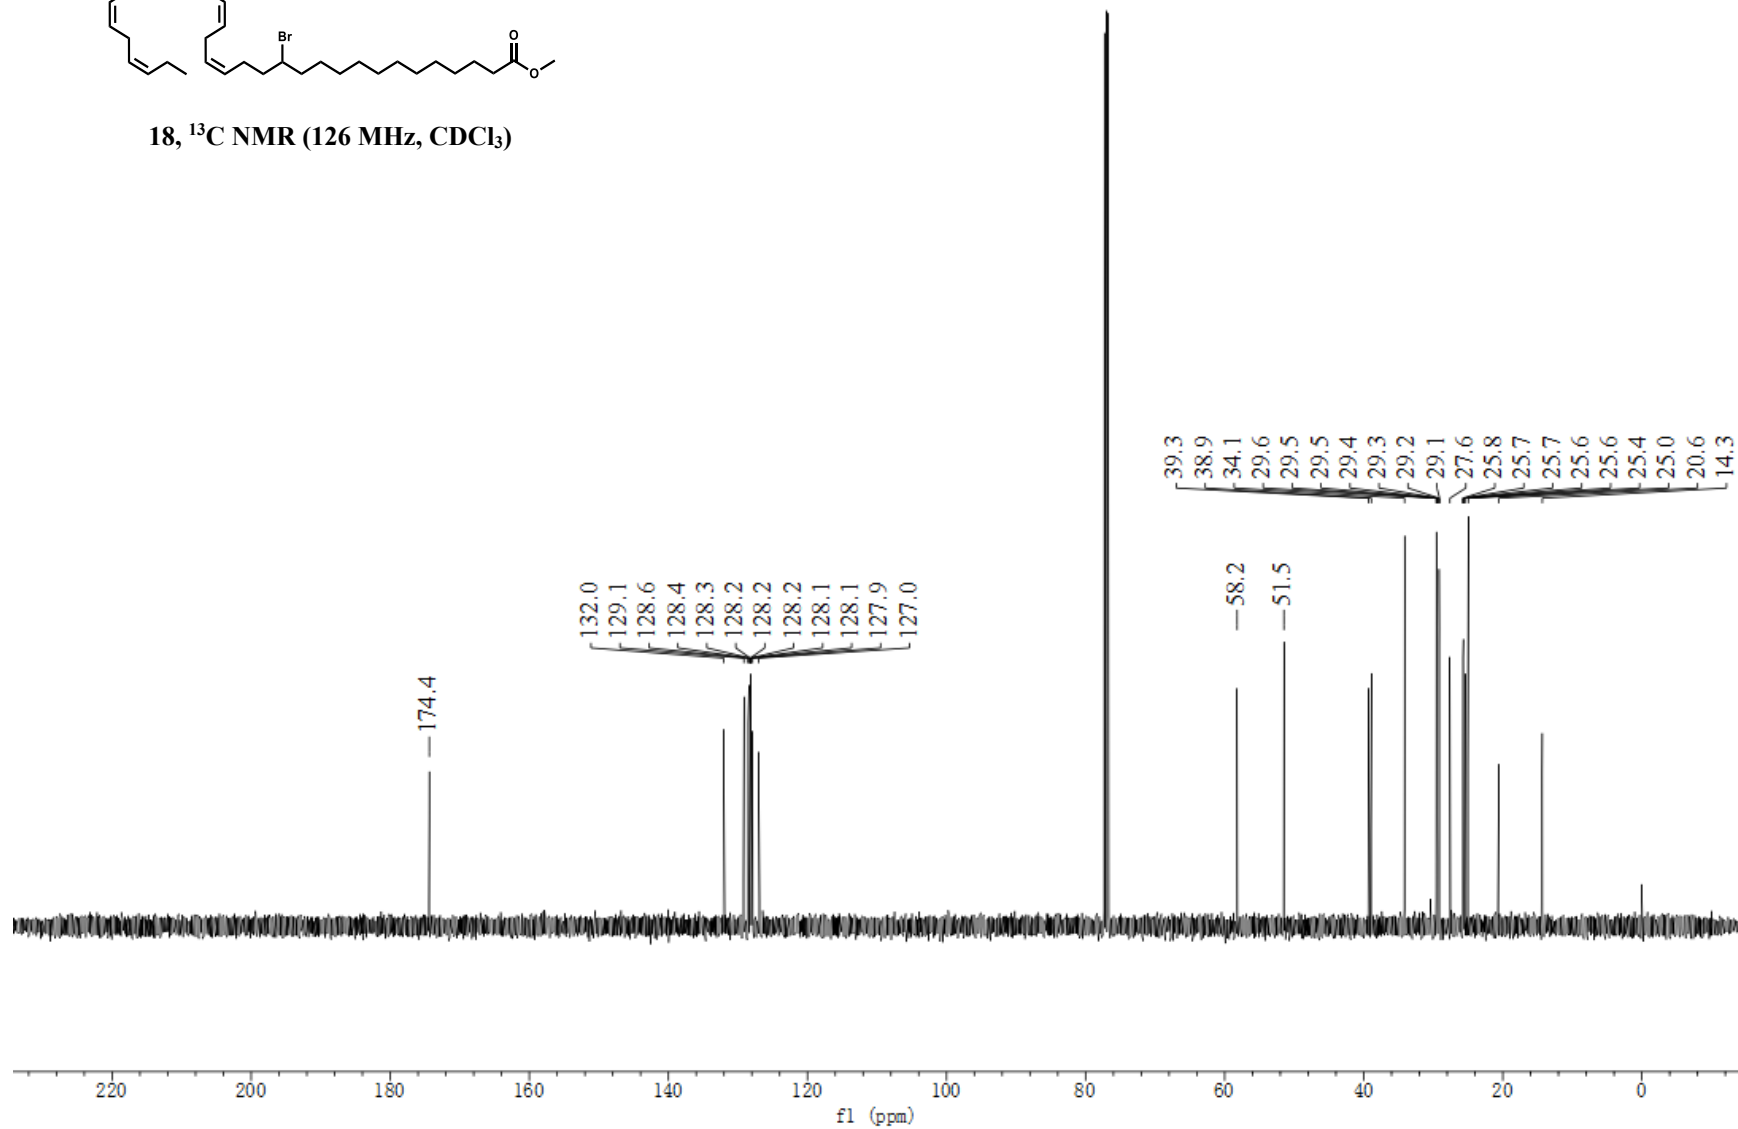

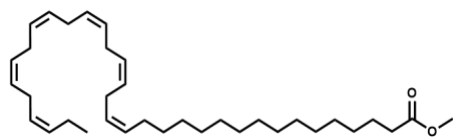

19, <sup>1</sup>H NMR (500 MHz, CDCl<sub>3</sub>)

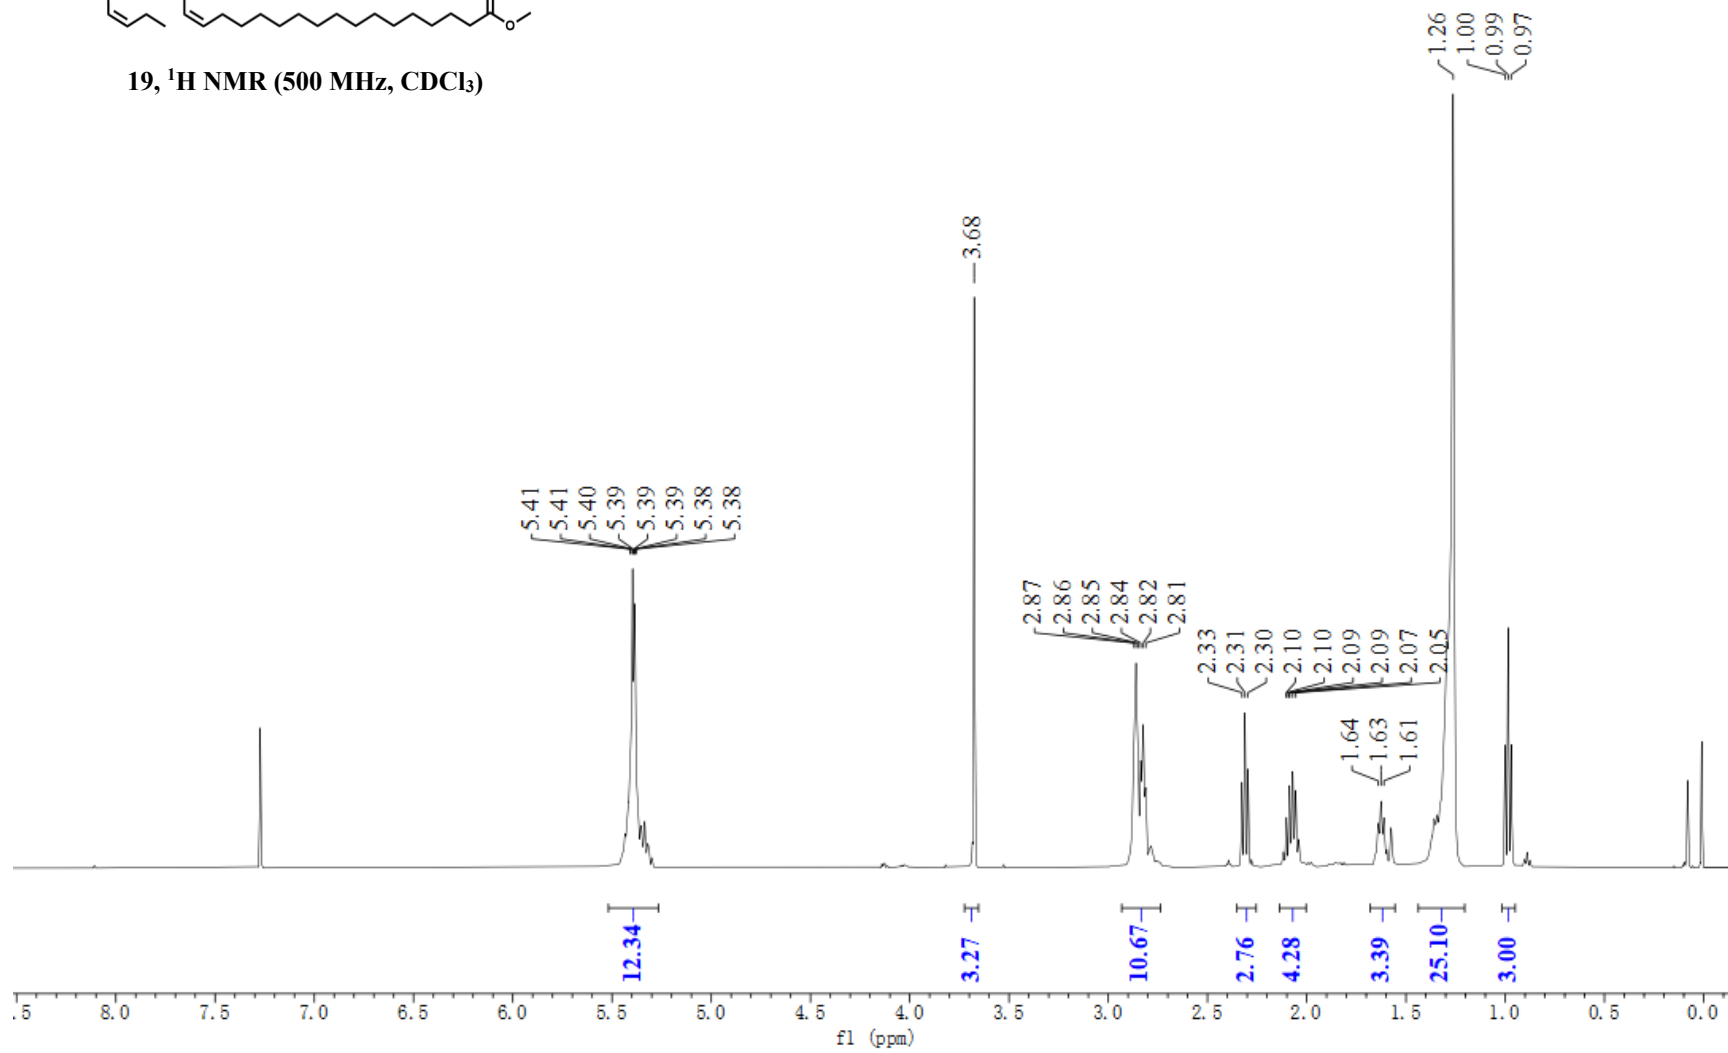

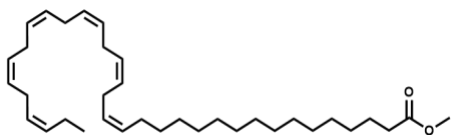

19,  $^{13}\text{C}$  NMR (126 MHz,  $\text{CDCl}_3$ )

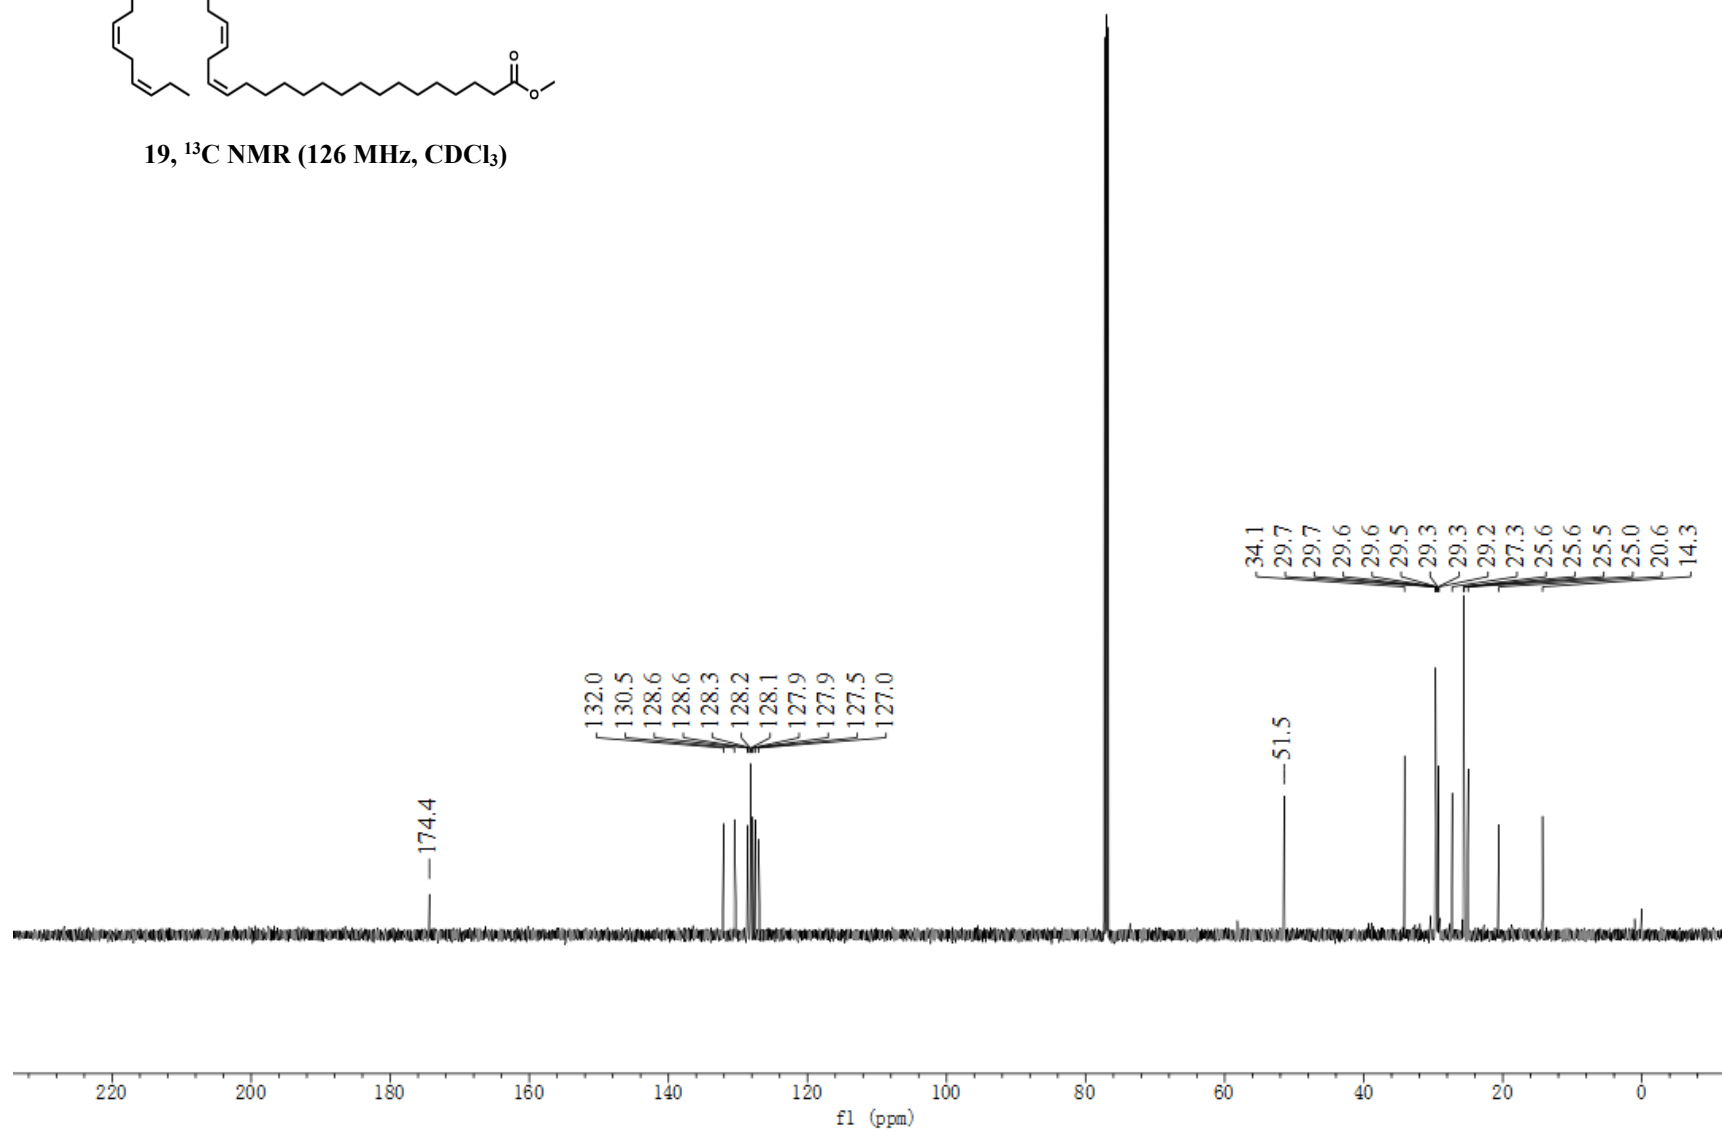

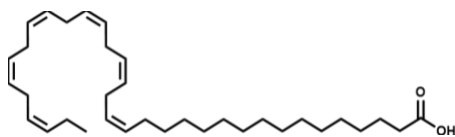

20, <sup>1</sup>H NMR (500 MHz, CDCl<sub>3</sub>)

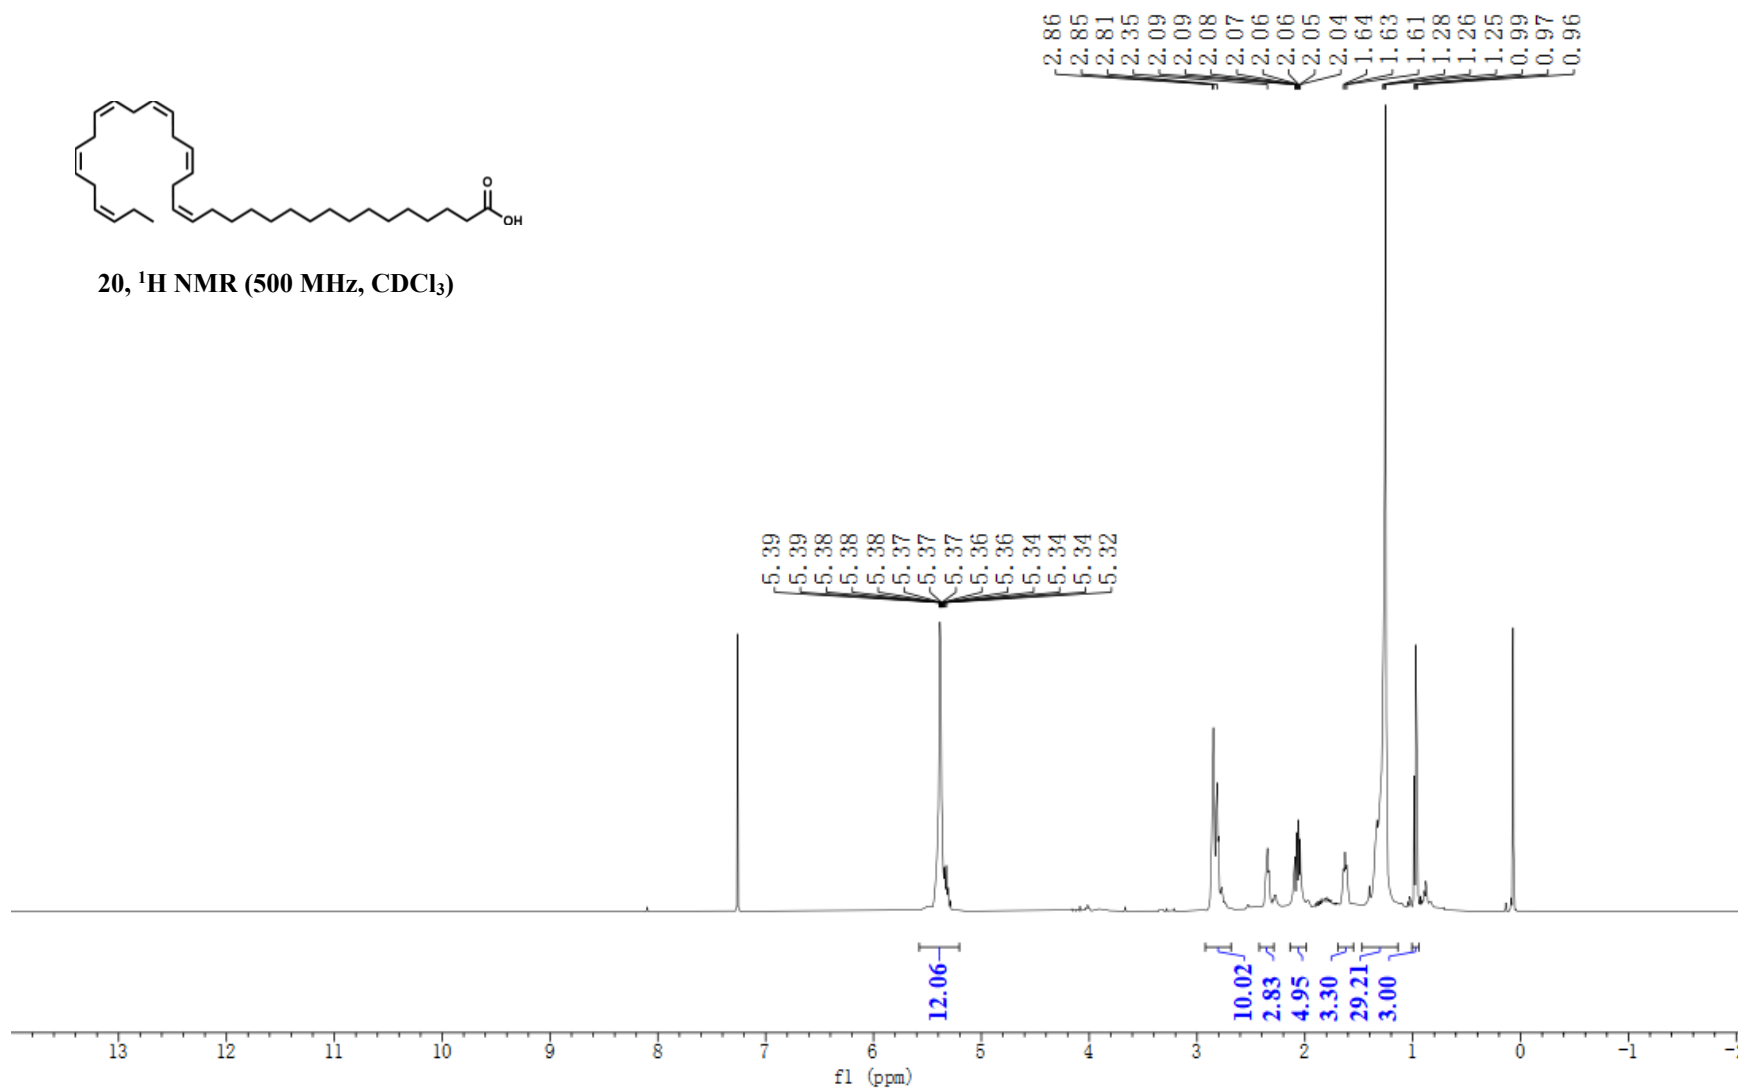

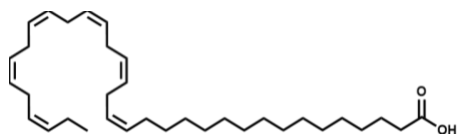

20, <sup>1</sup>H NMR (500 MHz, DMSO-d<sub>6</sub>)

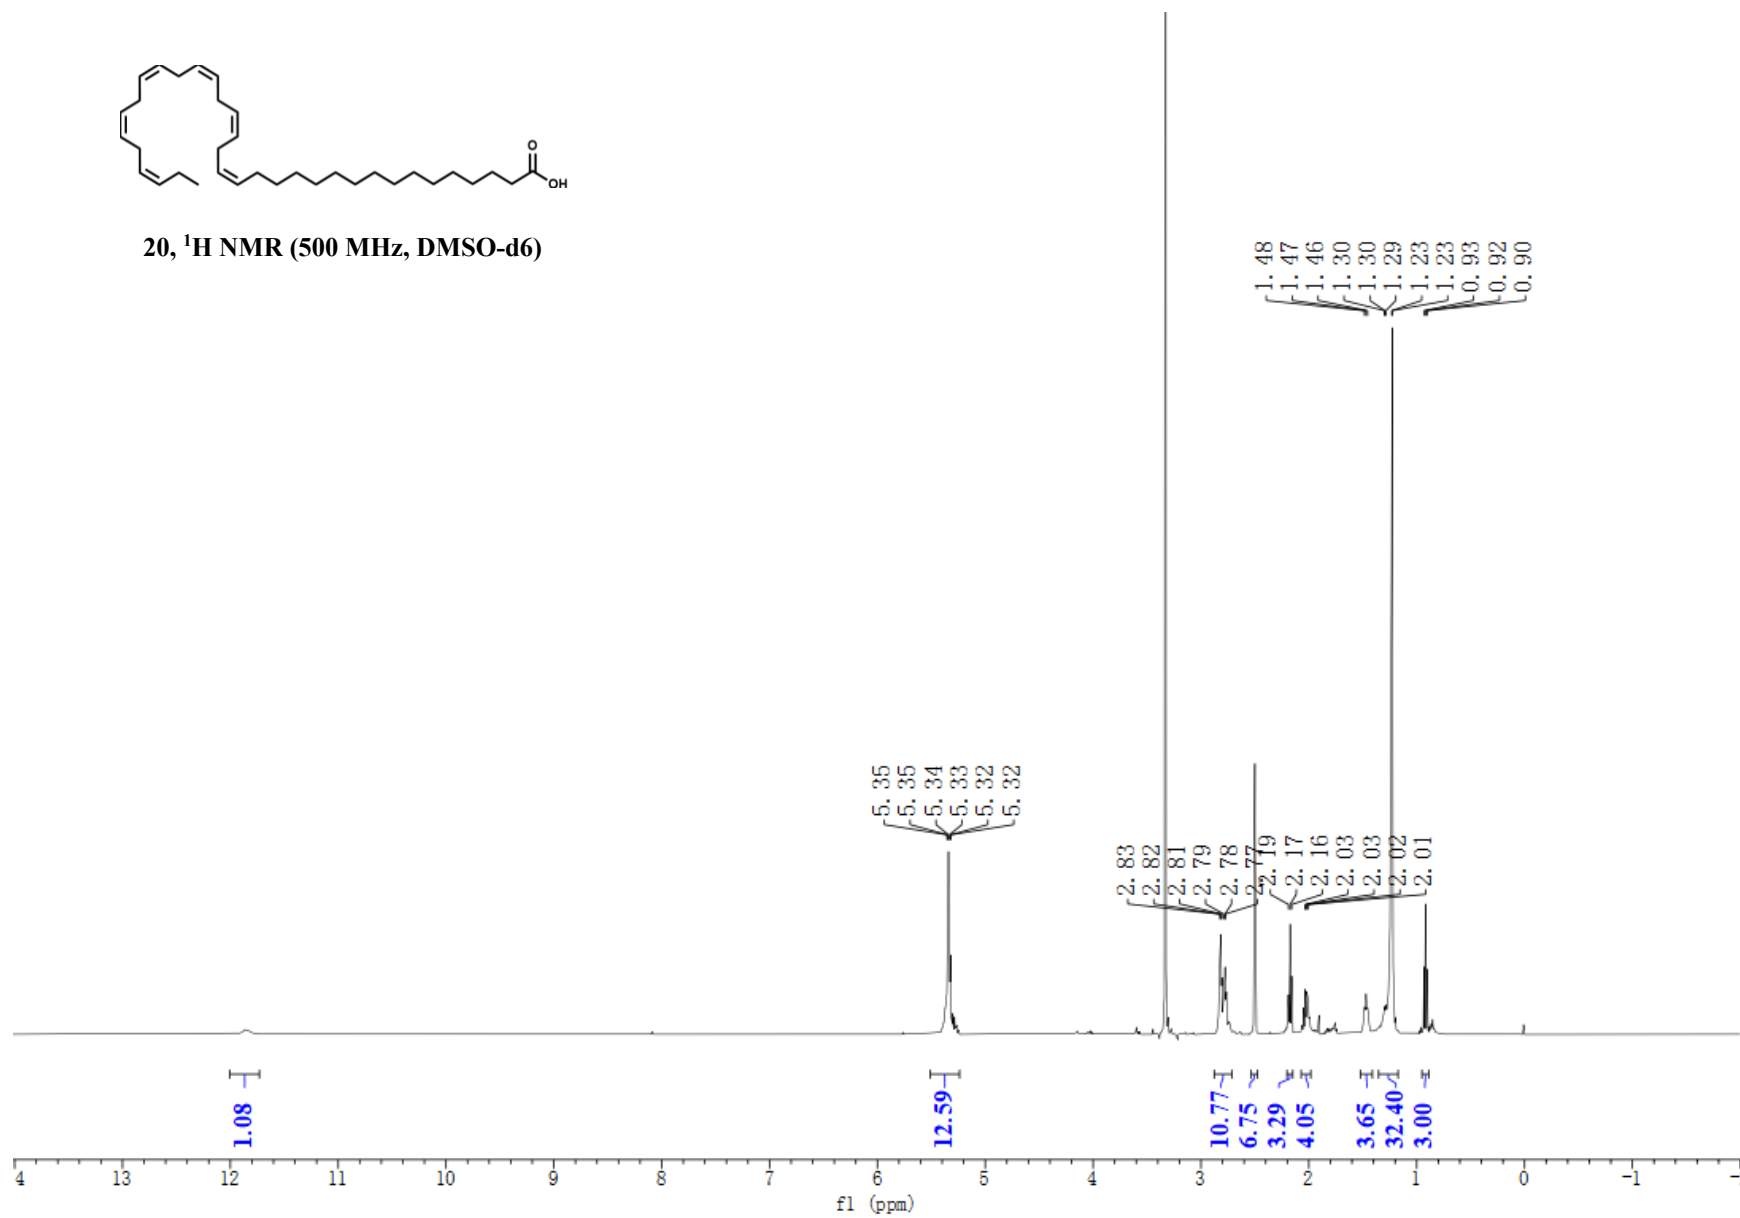

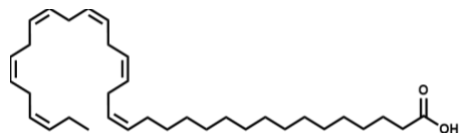

20,  $^{13}\text{C}$  NMR (126 MHz, DMSO-d6)

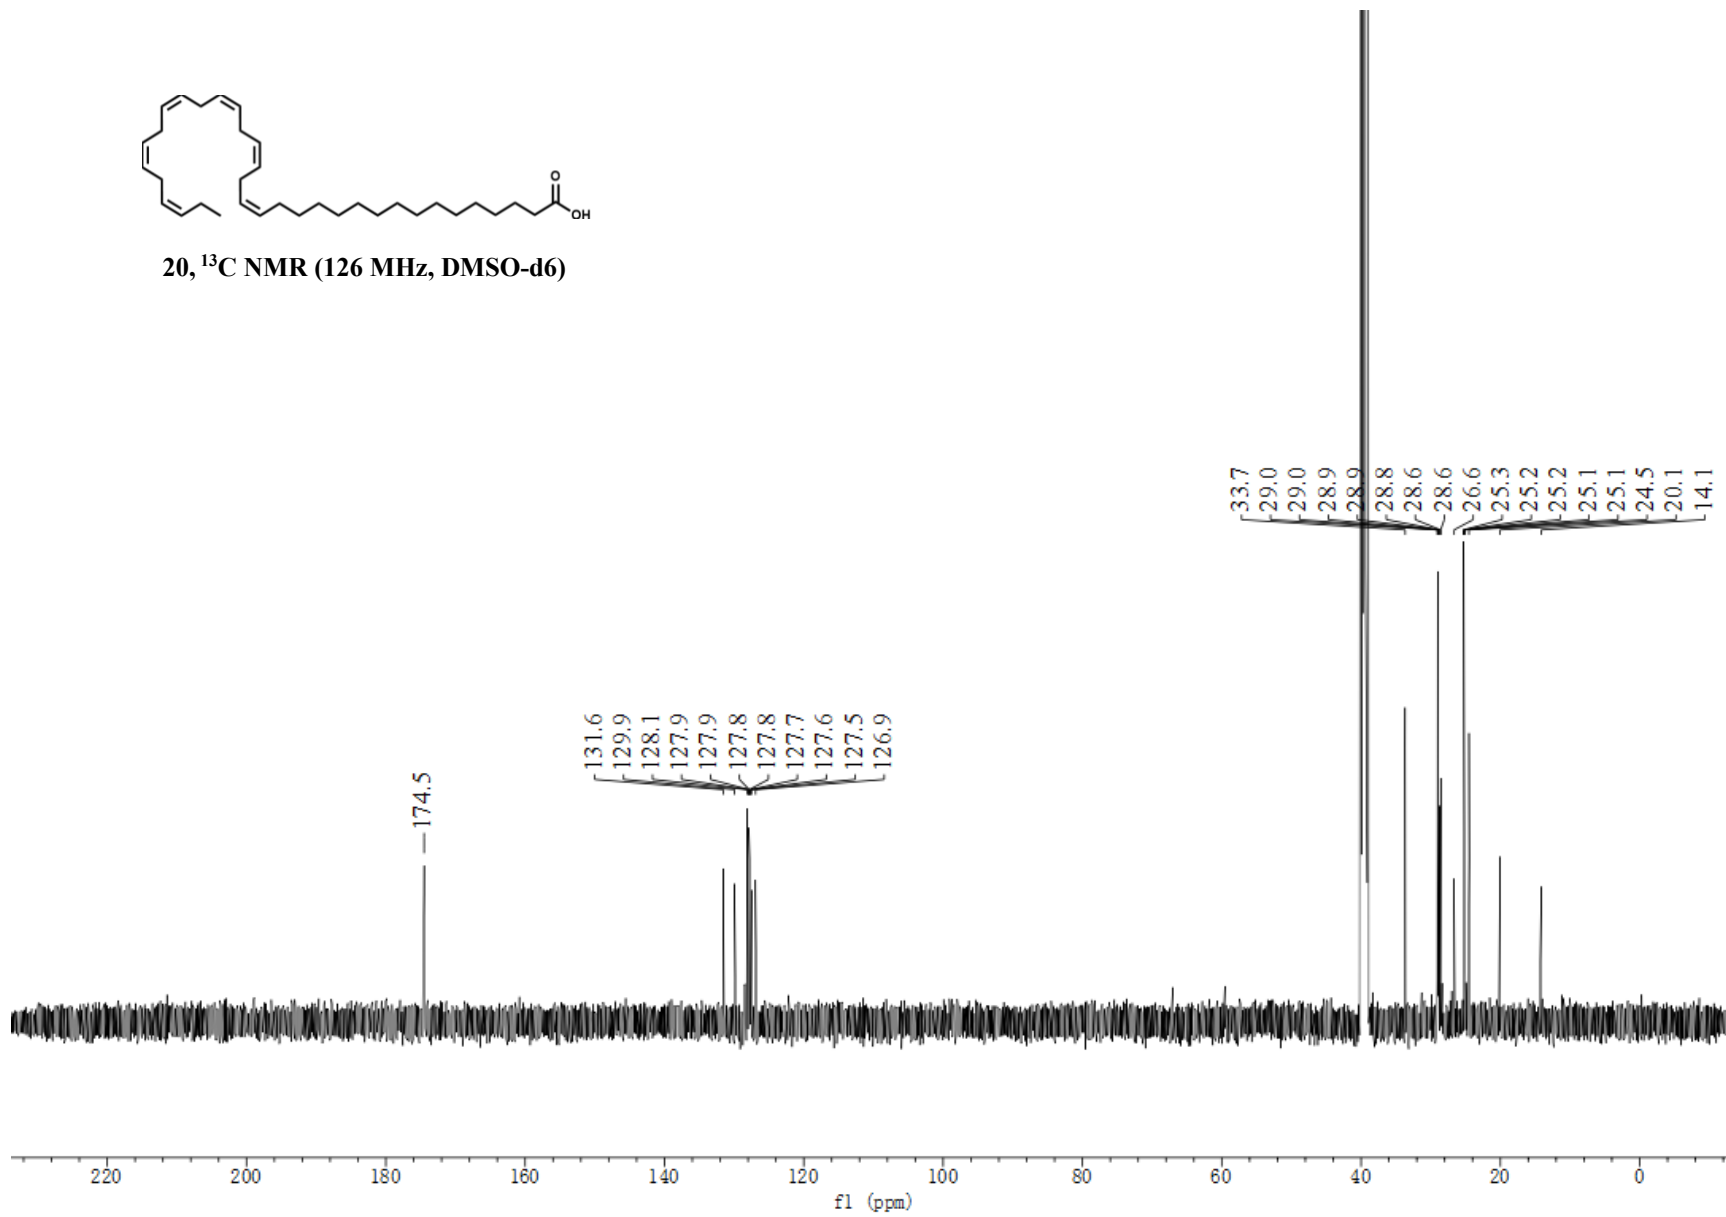

Supplement: d4ob00536h2.pdf [file d4ob00536h2.pdf]
